# Supplementary material for: Cell type-specific contributions to a persistent aggressive internal state in female Drosophila
Source: eLife. 2025 Jul 25;12:RP88598. doi: 10.7554/eLife.88598 (PMC12296262; doi:10.7554/eLife.88598)
Supplement: Figure 2—figure supplement 1—source data 1. [file elife-88598-fig2-figsupp1-data1.xlsx]

## Sheet: Figure2.1
Figure 2.1C - Source Data
15 flies per chamber														40 flies per chamber
Time (min)	Cntrl>CsChrimson	aIPg>CsChrimson							pC1d+e>CsChrimson					Time (min)	Cntrl>CsChrimson				aIPg>CsChrimson											pC1d+e>CsChrimson
0.0045	0	0	0	0	0	0	0	0	0	0	0	0		0.0045	0.167	6.078	0.381	2.632	0	0.775	0.155	0	2.778	4.167	3.238	0.175	0	1.111	0.855	2.393	8.039	1.261	3.5	0	0.185	4.242
0.0128333	0	0	0.513	0	0	0	0.476	0	0	0	0	0		0.0128333	0	10.98	0.571	2.632	0	0	2.791	1.333	2.222	3	0.571	2.281	0	2.54	4.957	1.026	3.922	0.18	4.667	0	2.778	0.404
0.0211667	0	0	3.59	0	0	0	5.238	0	0	0	0	0		0.0211667	0	1.569	2.095	0.877	0	1.24	2.326	1.333	0.37	0.5	0.381	0	0	3.968	3.419	0.855	5.686	0.721	2.5	0	2.407	0.606
0.0295	0	0	0	0	0	0	0	0	1.667	1.538	0	0		0.0295	0	4.706	1.714	9.123	1	4.961	2.791	0.333	0.926	0.5	0	0.877	1.5	4.286	2.222	1.026	4.118	1.081	3	0	0	0.404
0.0378333	0	0	0	1.778	0	0	2.857	0	0	1.538	0	0		0.0378333	0	3.725	2.286	5.088	0.667	0.62	0.62	0	2.778	3.667	1.333	2.807	1	0.476	1.197	0	0	0	5	0	0	1.818
0.0461667	0	0	0	6.667	0.37	0	1.429	1.667	0	0	0	0		0.0461667	0	0.98	2.857	5.614	0	0	0.465	0	2.593	1.5	0.381	2.105	0.5	0	3.761	0	1.176	0	2.5	0	0	3.434
0.0545	0	0	0	0.889	0.37	2.083	12.857	1.25	0	0	0	0		0.0545	0	3.725	3.048	7.895	0.167	1.55	0.465	0.833	2.778	0.333	0	3.158	4.167	0.952	1.197	0.171	4.706	0	3.5	0.976	0	1.818
0.0628333	0	0	0	0	0	0	10.476	0	0	0	5.238	0		0.0628333	0	0.196	2.857	7.719	0.667	3.101	0.775	3	1.481	0	0	1.93	1.167	0.952	0	1.368	0.392	0	0.833	2.439	0.185	2.222
0.0711667	4.286	0	0.513	0	1.481	0	4.762	0	0	0	1.905	0		0.0711667	0	3.529	3.238	7.719	1.667	0.775	1.085	4.667	0	0.167	2.667	0.175	3.667	0.952	0	0.342	3.137	0	0	0.65	2.778	3.03
0.0795	0	0	0	0	4.074	0	0	0	0	0	0	0		0.0795	0	3.529	4.381	9.474	0	2.636	0.31	0.5	0	0	1.524	0.526	0.5	0	1.368	0.171	2.745	0	0	0.813	0.185	3.03
0.0878333	0	0	0	0	0.741	0	0	0	0	0	0	0		0.0878333	0	0	0.19	3.158	0	4.651	1.085	0	0	0	1.714	1.754	0	3.016	3.248	0.171	2.745	0.541	0	2.439	0	1.616
0.0961667	0	0	15.385	0	0	0	0	0	0	0	0	0		0.0961667	0	0.196	0	0.175	0	0	2.016	0	2.222	4.167	1.143	1.053	0	4.603	2.393	2.222	0.784	0.541	0	2.439	0	1.616
0.1045	0	0	6.667	0	3.704	0	0	0	0	0	0	0		0.1045	0	0	0.571	1.228	1.667	0	2.791	0	0.556	5.333	0.762	0	0.167	3.333	1.88	0	0.588	0	0	0.65	0	3.838
0.112833	0	0	2.564	0	2.593	0	0	0	0	0	2.381	0		0.112833	0	1.373	0.952	1.404	0.833	0.62	2.946	0	3.519	1.833	0	2.105	2.5	2.857	1.368	1.538	0.196	3.243	0	0	0	0.202
0.121167	0	0	0	0	0	0	0	0	0	0	0	0		0.121167	0	3.529	0.19	0.877	0	4.031	0	0	0	0.5	0	1.754	1.667	1.429	3.932	4.444	0.392	5.405	1.833	1.138	0	2.222
0.1295	0	0	0	0	0	0	0	0	0	0	2.857	0		0.1295	0	0.392	0.19	2.632	0	3.566	0	0	0.556	1.833	0.571	4.211	6.667	0	5.128	2.051	2.157	5.405	0	1.301	0	4.848
0.137833	0	1.333	0	1.778	0	0	3.333	0	0	0	5.238	0		0.137833	0	1.373	0.381	2.982	2.833	2.946	0	0.333	0	0.833	0	1.228	3	0	5.641	0.513	0.98	5.405	0	0	0.185	0.808
0.146167	0	4.889	1.026	4	0	0	0	2.083	0	0	16.19	0		0.146167	0	0.392	2.476	3.684	1	2.171	0.93	0	0	2.833	0.19	0.702	0	0	2.906	0.855	3.725	5.045	0.333	0	0	1.616
0.1545	0	0	0	0	0	0	6.19	0	0	0	0	0		0.1545	0	4.51	0.19	0.877	0.667	0.93	3.721	0	0	1.333	0	1.93	2.5	0	2.564	0	1.961	3.604	1.167	0	0	5.455
0.162833	0	0	0.513	0	0	0	5.714	0.417	0	0	0	0		0.162833	0	2.941	0	0	0.167	2.636	3.256	0	0	0	0	1.579	2	0	0.513	0	0.392	7.027	0	0	0	4.444
0.171167	0	4	0	1.778	0.741	0	0.476	0	0	1.538	0	0		0.171167	2.167	0.98	0.952	2.281	2.167	1.86	1.085	0	0	0	0	0.702	0.5	1.429	1.538	2.222	0.98	3.243	0.333	0	0	3.03
0.1795	0	9.333	0	0	0	0	1.905	0	0	0	0	0		0.1795	4.667	3.725	0	0.351	2.5	2.326	0	0.333	0.37	0	0	3.684	0.167	0	2.393	1.709	5.294	0	0	0.976	0	1.01
0.187833	0	2.222	0	0	0	0	6.667	0	0	0	0	0		0.187833	2.5	4.118	0.571	0	1.333	0.465	2.326	0.667	3.148	0	0	3.158	0	1.111	0	3.761	6.078	0	0.833	0	0	0.404
0.196167	0	0	0	0	0	0	0	0	0	1.026	0	0		0.196167	0.167	3.529	0.571	1.579	0.167	1.24	1.55	1.333	1.852	0.333	1.905	2.807	0	0	0	0.171	4.51	0	0.167	0	1.481	1.01
0.2045	0	0	0	0	0	0	1.429	0	0	0	0	0		0.2045	1.5	0	2.095	0.175	0.5	0.155	0.465	4	5.926	3.5	0	1.93	0	0	0	0	8.431	0	2.5	0	0.741	5.859
0.212833	0	0	0	0	1.852	0	0	0	0	0	0	0		0.212833	0.5	3.529	3.619	0	0.167	0	0.62	3.5	4.259	3	0	1.404	0	0.317	0.855	0	6.667	0	1	0	1.481	1.01
0.221167	0	3.556	0	0	0	0	0	2.5	0	0	0	0		0.221167	0	2.549	2.857	1.404	0	0	0.62	0.667	1.852	3	0.762	0.877	0	0	2.564	2.051	0.784	1.802	0.167	0	0.185	1.212
0.2295	0	0	0	0	0	0	3.333	2.917	0	0.513	0	0		0.2295	0	0.98	3.81	1.228	0	0	1.085	2	0	3.667	0	0.877	1	1.111	0	5.47	1.765	1.622	1.833	0	0.37	4.04
0.237833	0	0	0	0	0	0	1.905	2.917	0	4.615	0	0		0.237833	0	0.784	3.238	0.175	0.5	1.085	1.395	2.5	2.037	0	1.524	3.333	0.833	2.54	0	7.009	0.784	0	1.5	0	0	0.606
0.246167	0	0	1.538	0	0	0	0	0	0	0	0	0		0.246167	0	7.059	5.714	2.982	0.333	2.946	0.155	7.5	3.148	0	0	5.088	0.5	0	0	5.299	1.569	0	0	0	2.778	2.222
0.2545	0	0	0	1.333	1.481	0	0	0	0	0	0	0		0.2545	0	6.863	2.857	2.105	0	0	1.395	8.333	0.926	1.833	0	0.175	0	0	0	4.615	2.549	6.667	0	0.325	2.593	0.404
0.262833	0	0	0	0	0	0.417	0	4.167	0	0	0	0		0.262833	0	1.176	3.048	4.561	1.667	2.481	1.395	1.333	0	0	0	0.877	0.167	0	0.171	0.855	0.588	7.568	0	4.553	0	0.202
0.271167	0	0	0	0	4.815	0	0	2.083	0	0	0	0		0.271167	0	0.588	2.857	5.263	0.167	5.426	0	0	0	0	0.19	1.228	0	3.81	0	0.513	1.373	1.441	0.333	4.065	0	1.212
0.2795	0	0	0	0	3.333	0	0	1.25	3.889	0	0	0		0.2795	0	5.49	0.19	1.053	2.333	1.085	0.465	4.167	2.593	0	0	0	0	0.952	0.342	0.171	3.725	3.243	0.667	2.276	0	4.646
0.287833	2.857	1.333	1.538	0	0	0	0	0.417	0	0	0	0		0.287833	0	4.902	0	0	0	2.326	2.171	1.667	4.444	1.5	0	1.754	0	1.746	0.513	0	0.392	3.784	2.167	0	0	0
0.296167	0.952	0	5.641	0	3.704	1.25	0	0.417	0	0	0	2.222		0.296167	0	2.157	0	0	1.333	3.876	3.101	0	3.519	1.333	0	1.754	0	1.905	0.171	0	0.196	3.784	2.333	0	0	1.818
0.3045	0	0	2.051	0	12.222	0.833	0	0	0	0	0	2.667		0.3045	0	0	0.19	0	1.333	0.31	2.326	0.833	3.148	0	0	1.579	0.833	3.016	3.59	0	1.569	1.081	5	0	0	0
0.312833	0	0	0	0	0.37	0	0	0	0	0	0	0		0.312833	0	0	0	0	1.833	0	1.705	0	5	0	0.19	3.684	0.333	0	1.026	1.368	1.569	0	6.167	0	0.556	1.01
0.321167	0	0	0	0	6.667	0	0	0	0	0	0	0		0.321167	0	0.392	0.19	4.035	1.667	2.326	0.775	0	9.63	0	0	1.404	0.667	0	6.838	2.564	0	0	2.5	0.65	0	0.606
0.3295	0	2.222	0	0	6.667	2.5	0.476	0.417	0	0	0	12		0.3295	0	0.392	0.762	5.263	2.333	4.651	0.31	0.5	3.519	0	1.714	0	2.333	0.317	7.35	1.197	1.569	0	1.833	1.789	0	2.424
0.337833	0	0	0	0	4.444	2.917	0.952	0	0	0	0	0.444		0.337833	0	0	2.857	4.386	1.333	3.566	3.721	0.167	2.778	0	0	0.877	0	1.27	5.983	0	3.137	0	0.833	2.276	0	5.253
0.346167	0	0	0	0	0	0	0	0	0	0	0	0		0.346167	0	3.333	2.857	0	0.667	3.721	4.186	2.5	2.963	0	0	0.702	1.833	2.381	2.051	1.88	0.784	0	0	0.488	0	6.061
0.3545	5.238	0	0	0	0	0.417	0	0	0	0	0	0		0.3545	0	0.784	2.667	0.877	0	3.411	0.155	3.333	1.667	0	0.952	0	0.667	2.381	1.026	2.564	4.51	0	2	3.252	1.481	2.424
0.362833	6.667	0	0	0	0	7.083	0	0	0	0	0	0		0.362833	0	0	0	1.228	0	2.481	1.55	2.833	3.148	0	0	1.053	1.5	0.317	3.248	2.564	3.137	0	2.667	6.992	0.741	6.869
0.371167	7.143	0	0	0	0	0.833	0	0	0	0	0	0		0.371167	0	0	0.19	0.175	0	2.481	0	1.833	1.296	2.167	0	0	0	1.429	3.419	0	2.353	0	0	4.878	0	6.061
0.3795	3.81	2.222	0	0	0	0	0	2.5	0	0	0	2.222		0.3795	0	0	2.667	0	0.667	5.581	0.93	0.5	2.963	2.167	0	0	0.833	0.159	3.761	1.538	2.745	0.18	1.833	5.528	0	0
0.387833	7.143	0	0	0	3.333	0	0	8.333	0	0	0	0		0.387833	0	0	2.857	0	2.167	2.326	0	2.5	2.963	4.5	0	0	0.333	0	2.222	4.615	3.922	3.964	0	1.138	0	1.616
0.396167	4.762	0	0	0	0	0	0	0	0	0	0	2.667		0.396167	0	1.569	2.857	0.526	0.167	2.326	0.155	0.833	6.667	0	0	0	1	0	0.684	0.171	0	3.063	0	3.415	2.593	0.202
0.4045	0	0	0	0	2.963	0.417	0	0	0	0	0	0.889		0.4045	0	2.745	3.429	5.263	0	3.721	1.085	2.667	7.037	2.667	0.762	0	0	0.635	3.077	0	0	3.243	0	4.228	5	1.01
0.412833	2.857	0.889	0	4.889	10.741	0	0	0	0	0	2.857	0		0.412833	0	1.765	2.857	0	0	2.946	0.465	0	6.481	0	0	2.281	0	2.063	2.906	0	0	3.423	0	1.301	0.926	2.02
0.421333	0	0	0	4	7.037	6.25	0	2.917	0	0	2.857	0		0.421333	1.333	1.373	3.619	1.93	0	2.326	2.171	1	6.852	1.5	0	1.053	0.667	1.27	0	2.051	0	2.162	0	2.764	0	4.848
0.429667	0	0	0	2.667	0	0	1.429	0	0	0	0	0		0.429667	0	1.569	2.857	1.404	0.167	3.411	1.395	1.167	3.333	1.5	0.381	1.404	0.5	1.27	0.171	0.855	0	1.802	0	2.439	0	2.424
0.438	0	0	0	0	1.852	0	0	0	2.222	0	0	0		0.438	0	3.333	2.857	0	0	2.791	0	2.333	0	0	1.905	0	0	4.286	4.615	0	1.569	2.162	0.833	4.065	0	4.242
0.446333	0	0	0	0	0	0.833	0	0	4.444	1.026	0	0		0.446333	0	4.706	2.857	0	1	4.341	0.155	0	0.185	0.5	0	5.614	0.667	0.635	0.342	0	2.745	2.703	0.167	5.528	2.407	0
0.454667	0	5.333	9.231	0	0	0	0	6.667	0	0	0	0		0.454667	0	1.765	2.857	0	2.5	6.822	4.031	0	1.852	4.833	0	5.965	3.5	0	0.342	0	0.784	4.505	0.5	6.504	0	0.404
0.463	0	0	2.051	0	2.593	0	0	2.5	0	10.769	0	4		0.463	0	0.196	2.857	0	0.5	2.481	2.946	1.333	0.185	4.833	0	5.789	1.167	0	2.222	0	0.98	5.405	0	4.065	0	0.808
0.471333	0	0	0	0	2.222	0	0	2.5	0	1.026	1.429	3.556		0.471333	0	0.196	2.857	0	0	1.86	2.016	0	0.556	2.167	1.143	7.368	0	0	5.641	0	1.176	1.982	0	2.276	0	0.202
0.479667	0	0	0	0	0	0	0	0	0	0	4.286	0		0.479667	0.667	0.98	2.857	0	0	3.566	1.085	3.333	1.667	0.5	0.762	0	4.5	2.222	1.368	0	0	0	1.167	3.902	0	5.051
0.488	0	0	0	0	0	0	0	5.833	0	0	0	0		0.488	1.5	0	2.857	0.702	0	3.101	2.791	3	0	1.167	0.19	4.386	0.167	1.27	0.855	0	0.98	0	0	2.439	0	7.071
0.496333	0	0	0	0	1.481	0	0	0.417	0	0	0	0		0.496333	0.667	0.784	2.857	6.316	0	4.186	0.31	0	1.296	0.333	0.571	2.105	0.333	0.952	4.786	0	9.02	0	0	2.439	0	11.111
0.504667	0	0	0	0	5.556	0	0	0.417	0	0	0	0		0.504667	1	1.569	2.857	3.86	0.833	3.256	0.93	0.333	3.704	0	1.714	0.877	0.167	0	2.735	0	6.471	0	2.667	2.439	0	1.818
0.513	0	0	0	0	1.481	0.417	0	0	0	0	0	0		0.513	0.5	0	4	5.088	0.167	4.961	0	0.333	2.963	0	0.762	2.456	0.333	0.159	3.932	0	1.961	0	2.167	2.439	0	4.444
0.521333	0	0	0	0	2.593	0.833	0	0	0	0	0	0		0.521333	0	0	3.619	7.544	0.167	5.426	1.085	2.5	5.185	0.5	0	2.807	1.167	0.635	0	0	1.176	0	1.667	2.439	0	2.626
0.529667	0	0	0	0	0	0	0	0	0	1.026	0	0		0.529667	0	4.118	2.857	6.14	0.167	2.016	0.31	1.5	6.667	3	0	2.982	3.167	0	0	0	0.588	0	2.833	2.439	0	0
0.538	0	0	0	0	0	0	0	0	0	4.103	0	0		0.538	1	4.51	4.381	0.175	0.333	1.24	1.395	0	3.889	1.5	1.524	0.526	1.5	0	0	0	3.725	1.441	5	3.252	0	0
0.546333	0	0	0	0	3.333	0	0	0	0	0	0	0		0.546333	0	1.569	5.143	1.404	0.333	0.62	0.93	0.167	8.889	0.333	0	0	1	0.952	1.709	0	0.196	1.982	1.833	2.439	0	0
0.554667	0	0	0	0	0	1.667	0	0	0	2.564	0	0		0.554667	0	0.588	8.381	2.632	0.5	1.55	1.085	2	2.963	3.5	1.333	0	3.833	0	0	0.684	1.961	6.126	0	2.439	0	0.808
0.563	0	0	0.513	0	9.63	0	0	0	0	0	0	5.333		0.563	0	0.196	6.095	1.93	0	1.085	0	0	2.222	7.333	0	5.263	2.5	0	2.051	0	0	2.703	3.833	2.439	0	0
0.571333	0	0	8.205	0	0.37	5	0.952	0.833	0	0	0	10.667		0.571333	0	0.784	2.857	2.632	0.167	0	0	0	2.963	3.833	0	2.807	0	0	0	0.171	2.157	2.342	4.167	2.439	0	0
0.579667	0	3.111	13.846	0	0	0	0.476	0	0	0	0	0.889		0.579667	0	1.373	6.095	4.211	0	0	0	0.333	2.963	4	0	1.754	0	0.635	0	0.855	0.196	0	2.5	2.439	0	0.202
0.588	0	9.333	4.103	0	8.519	1.667	0	0	0	0	0	0		0.588	0	0.98	6.095	4.211	0	0	1.085	0	0.185	1.5	1.143	2.807	0	0.952	0	1.88	0	0	4.333	2.439	0	0
0.596333	0	1.778	2.564	0	5.185	0	0	2.5	0	0	0	0		0.596333	0	0	8.571	0	0.167	1.55	0	0	3.704	2.5	0	1.228	0	1.27	0.684	3.59	0.392	0	0	0.813	0	0.606
0.604667	0	0.444	3.59	4.444	2.222	0	0	0.833	0	1.538	0	0		0.604667	0	0	5.524	2.456	0.167	3.566	0	0	10.185	3.5	0	0	0.5	2.063	1.026	0	0	0	0.167	1.951	0	1.414
0.613	0	0	0	3.111	3.704	0	0	0.417	0	0.513	0	0		0.613	0	0	2.857	1.228	1.5	0	0	0	4.444	3.667	0.571	0.351	0	2.54	0.513	0	0.392	0	0.167	0.813	0	0
0.621333	0	0	0	0	0.37	0	0	0	0	5.641	0	0		0.621333	0	0	2.857	1.754	1.333	0	0.31	0	2.222	3.667	2.857	2.807	1.667	1.587	0	0	0.196	0.541	1.833	0.325	0	0
0.629667	0	0	0	0	0	2.083	0	0	0	0	0	0		0.629667	0	0	3.048	2.632	3.167	0.775	2.171	0	4.815	2.5	6.476	2.456	1.667	0.159	1.709	0.513	0.784	0	0	0	0	0
0.638	0	0	1.026	0	0	2.5	0	0.417	0	0	0	0		0.638	0	2.353	2.857	3.333	1.333	0	3.411	0	2.222	0.333	0.19	0	0.167	1.429	4.957	0	0	0	0.167	1.138	0	0
0.646333	0	0	1.538	0	0	0.417	0	0	0	0	0	0.889		0.646333	0	0.392	4.381	7.719	1.5	0.62	3.411	0	0.556	1.167	0.762	0	0	0	4.274	0.855	0.196	0	0	0.488	0	4.848
0.654667	0	0	0	0	0	0	0	1.667	0	0	0	0		0.654667	0	1.176	5.714	8.772	3	0	2.791	0	1.667	0	1.143	0.877	0	0.952	0	1.709	1.765	0	0	0.65	0	3.232
0.663	0	0	0	0	0	0	0	2.917	0	0	0	0		0.663	0	2.353	6.476	7.368	2.5	1.085	0	1	0.556	0	0	1.228	1.5	1.429	1.538	0.684	0.196	0	0	0.976	0	2.424
0.671333	0	0	0	0	0	0	0	0	0	0	0	0		0.671333	0	0	6.286	6.491	2.333	2.016	0	0.667	2.037	0	0	0.175	0.333	0	1.197	0	0.392	0	0	1.951	0	3.434
0.679667	0	0	5.641	0	0	0	0	0	0	0	0	0		0.679667	0	0	5.714	1.404	0	0.155	1.55	0	3.704	0	0	1.053	1.667	0	2.564	0.171	0	0	1.833	2.439	0	4.04
0.688	0	0	0	0	1.481	0	3.81	0.417	0	0	0	0		0.688	0	0	5.714	0.175	0.333	2.636	2.946	1.833	2.037	0.667	0.19	6.14	0	0	2.564	0	3.922	0	2.833	1.301	0	0
0.696333	0	0	0	0	0	0	6.19	0	0	0	0	0.444		0.696333	0	0	5.714	1.228	2.167	0	1.085	3.5	3.333	0	1.143	0.175	0.333	0	3.419	0	1.569	0	1.5	0.488	0	0
0.704667	0	0	0	0	4.444	0	4.286	0	0	0	0	0		0.704667	0	0	5.714	1.579	4.333	0	2.481	6	2.778	0	0.571	0	0	0.476	3.932	0	2.745	1.441	2.333	2.114	0	0
0.713	0	0	0	0	2.593	0	0	0	0	0	1.429	5.333		0.713	0	0	5.714	2.632	1.167	0	1.86	2.833	0.926	0	0	0	0.833	0.794	3.932	0.684	5.098	0	3.167	0.488	0	1.01
0.721333	0	0	0	0	1.481	0	0	1.667	0	0.513	7.143	2.222		0.721333	0	0.196	4.381	2.632	0.833	0.62	0.465	3.167	0.37	1.833	0.952	0	0	3.492	8.547	3.761	4.118	0	0.167	0.813	0.185	1.01
0.729667	4.762	0	0	0	1.481	0	0	0.417	0	3.59	0.476	0		0.729667	1	2.549	2.857	2.632	2	0	2.016	0	1.111	2.333	0	0	0.167	3.81	5.47	0	0	0	1.167	0.325	0	0
0.738	0	0	0	0	0.741	0	0	0	0	0	0	0		0.738	2.333	2.157	2.857	1.404	0	0	1.395	0	0.37	2.5	2.286	4.737	0.667	1.746	3.59	0	0	0	3.5	0.325	0.926	0
0.746333	0.952	0	0.513	0	0	1.667	0	0	0	0	0	0		0.746333	1.333	0	4.19	2.632	1	2.171	1.55	0	2.593	1.5	2.286	6.316	0.333	0	5.641	0	0	0	3.333	0.488	4.259	0
0.754667	0	0	0	0	0	0	0	0	0	0	0	0		0.754667	0.167	0.196	4.381	2.632	0.667	0	6.047	0.167	1.111	2	0.19	5.965	0.167	0	3.932	0.855	1.176	0	0.667	0.325	2.778	0
0.763	0	0	0	0	1.481	2.5	0.952	0	3.889	0	0	0		0.763	2.333	1.569	3.429	2.281	0.667	1.085	1.86	2.5	0	1.833	5.524	1.404	0	0.476	2.564	0	1.176	0	0	0.163	0	0.808
0.771333	0	0	0	0	2.593	0	0.476	0	3.333	0	0	0		0.771333	0.833	0.98	4.762	0	2.167	1.085	12.093	0.167	0	1	3.238	0.877	0.167	0.794	2.564	0.513	0	1.441	0.167	0.488	0	2.222
0.779667	0	0	0	4	2.593	2.083	10.476	0	0	0	0	0		0.779667	0	0	3.81	0	0	0.465	1.55	0.5	0.926	0	0	0.351	1.667	2.222	1.88	0	0.196	0	2.667	0	0.926	3.636
0.788	0	0	0	5.333	1.111	0	0	0	0	0	0	0.444		0.788	1	0	0.952	0	0	0	4.651	3.5	1.852	2	0.762	0.526	1.167	0	0	0	0.392	0	2.833	1.301	1.667	0.202
0.796333	0	0.444	0.513	0	3.704	0	0	1.667	0	0	0	0.889		0.796333	1.167	0	4.19	0	0	1.705	5.426	2.333	2.407	0	0	1.754	0.833	0	0.513	0	0	0.18	2.5	2.602	0	1.01
0.804667	4.286	0.889	5.128	0	0.741	0	0	0	0	0	0	1.333		0.804667	0	0.196	4.381	0	3.667	4.496	1.86	3.667	3.704	0.5	0.19	1.053	6	0	1.88	0	0	2.523	3.167	2.276	0	0
0.813	0	0	3.59	0	0	0	0	0	0	0	0	0		0.813	0	2.549	4	0.175	0.167	2.481	0.62	4.667	0.926	0	1.905	3.158	1.333	0	2.564	0	3.725	1.802	1.167	0.163	0	0
0.821333	0	2.667	0	0	0.741	0	5.714	0	0	0	0	1.333		0.821333	0	0	0.19	1.053	0	0.465	0.31	0.667	3.519	0	3.238	1.404	0	2.063	0	0	0.98	1.081	0	0	0.37	1.414
0.829667	0	0	0	0	3.333	2.083	0	0	0.556	1.538	0	0.444		0.829667	0.333	0	0	1.228	0.667	0.31	4.496	0.5	1.852	0	0.762	1.228	0	3.651	0.342	0	0.392	0.901	2	0	2.407	3.232
0.838	0	0	0	3.111	0	1.667	0	0	0	0	0	0		0.838	0.5	0	5.905	0	0	1.705	2.481	4	2.593	0	2.476	0.877	0	1.429	3.761	0	0.392	1.622	2.5	0	0	0
0.846333	0	0	0	0	2.963	2.917	0	0	0	0	0	0		0.846333	0	2.549	7.238	0	0	2.636	3.566	3.833	3.148	0	1.143	1.053	0	0	7.692	0	0.196	0	1.667	0.488	0.556	0
0.854667	0	0	0	0	11.111	0	0	0	0	0	0	0		0.854667	0	0.588	3.619	0	0.667	0.62	0.775	2.5	3.704	1.333	1.333	2.632	1.833	0.635	5.812	0	2.353	0.541	0	0	0.926	0
0.863	0	5.333	0	0	1.111	0	0	0	0	0	0	0		0.863	0	0.196	2.857	0	0.667	1.55	1.86	2.667	0	1	0	0	0.167	3.016	5.128	0	1.176	2.162	1.333	0	0	2.02
0.871333	0	4	0	0	0	0	0	0	0	0	0	0.444		0.871333	0	4.902	2.095	0	0.167	0.465	0.775	3.5	0.926	0	0	0.877	0	0	2.564	0	1.176	3.964	1.333	0	0	0.404
0.879667	0	0	0	0	1.852	0	3.333	0	0	0	0	0		0.879667	0	0.196	0	1.053	0	0	1.86	3.833	0	2	1.524	0	1	0.159	5.47	0	0	0	1.167	0	0	0.202
0.888	0	1.333	1.026	0	1.111	0	0	0	0	0	2.857	0		0.888	0	0.196	1.524	0	1.167	0.465	2.171	3.667	0	4.667	0	6.14	0	0	2.222	0.684	2.157	0	0	0.488	0	0
0.896333	0	0	0	0	2.963	0	0	0	0	1.538	0	0		0.896333	0	0	0	0.877	0.333	1.24	4.031	2.5	1.111	3.333	0	1.228	0	0.317	0.171	1.026	1.961	0	0	0	0.556	0
0.904667	0	2.667	0	0	3.704	0	0	0	0	0	0	0		0.904667	0.833	0	0	2.281	0.5	0.31	2.481	2.5	2.963	3	0.571	1.93	0.667	0.794	2.564	1.88	0	0	0	0.325	3.704	0
0.913	0	0	2.051	0	2.593	0	0	0	0	0.513	0	0.889		0.913	0	0.588	0	1.93	2	1.395	4.651	4	2.407	2.667	4.952	2.105	0	1.746	0.513	3.419	0	0	1.833	0.325	2.778	0
0.9215	2.857	0	0	0	0	0.417	0	0	0	0	0	0		0.9215	0	2.549	0.762	4.561	4.833	0.31	7.907	2.5	1.111	1.5	2.857	0.526	1	1.905	0	0.171	0.392	0	0.333	0.325	2.778	0
0.929833	7.143	0	0	0	10.37	7.083	0	3.75	0	0	0	0		0.929833	0	1.765	2.857	5.263	1.333	0.155	1.085	0	1.296	0.5	2.857	3.158	1.5	0	0	3.077	0.588	1.622	1	0	0.926	1.212
0.938167	0.952	0	0	0	4.074	0.417	0	0.417	0	6.667	0	0		0.938167	0	0	2.857	5.263	0.833	0	3.876	0	2.593	1.5	2.286	9.649	0.167	0	3.59	3.248	0	0	0.833	0	0	0
0.9465	0	0	0	0	1.852	0	0	0	5.556	6.154	0	0		0.9465	0	0	2.857	5.789	0	0.31	1.705	0	0	0.5	0	2.982	0	0	1.368	3.419	0	1.081	0	0.976	0	0
0.954833	0	0	9.744	0	0	0	0	1.25	0.556	0	0	0		0.954833	0	0	2.857	2.632	0	0.465	1.24	1.833	0.926	0	2.857	1.579	2.167	0.317	0	1.709	0	2.523	0.167	0.163	0	0
0.963167	0	0	8.205	0	0	1.25	0	0	0	0	0	0		0.963167	0	0	2.857	2.632	0.833	0.93	0.62	4.5	2.778	0	4.762	5.263	1.833	0	0.684	3.59	0	0	4	0	1.296	0
0.9715	0	0	0.513	0	0.37	0	0.952	0	0	0	0	0		0.9715	0	0	6.667	2.632	3.5	0.465	0.775	0.667	0.185	0	0	4.211	1.333	0	0.171	1.538	0.98	1.802	1.167	0.488	1.296	0
0.979833	0	0	0	3.111	3.704	0	6.19	0	0	8.205	0	0		0.979833	0	0	6.095	3.684	3.167	0	0.465	0	0	0	0.381	0.526	0.167	0	0	0	0	0	0	0	0	0
0.988167	0	0	0	0	0.37	0	0	0	0.556	0	0	0		0.988167	0	0	7.238	4.912	1.167	0	0.155	0	0	0	1.714	0.526	0	0	1.709	1.026	0	0	0	0	0.185	0
0.9965	0	0	1.538	0.889	2.963	0	0.952	0	3.889	0	0	0		0.9965	0.833	0	7.048	3.684	1.5	0	2.481	0	3.889	0.167	3.238	0	1.333	0	2.564	4.103	0.392	0	6.167	0	0	1.414
1.00483	0	1.333	7.179	0.444	9.63	0	10.476	0	1.667	0	0	0		1.00483	0	0.196	8	0	2.833	0.155	0.93	0.833	4.259	4.833	2.095	2.456	0	4.127	2.564	3.077	1.961	1.982	7.167	1.301	0	0.404
1.01317	0	6.667	12.821	9.778	15.556	0	16.667	0	2.778	0	0	0		1.01317	0	0	6.857	0	8.333	7.132	0.155	4.667	10.741	15.333	7.429	8.596	1.833	4.921	2.564	10.598	8.431	5.225	19.833	5.854	1.852	13.131
1.0215	0	6.667	17.949	13.333	16.667	4.167	26.667	0	1.667	0	0	0		1.0215	0	0.588	5.714	0	16.5	18.605	0	17	13.889	23.667	23.238	10.351	8.667	9.683	6.838	18.12	14.902	24.144	25.167	9.593	13.148	25.455
1.02983	0	11.111	31.282	17.333	16.667	12.5	21.429	0	0	5.128	0	0		1.02983	0	0.196	4	2.281	19.833	23.721	2.946	22.5	16.481	24.342	27.619	10.526	13.333	13.345	7.521	20.855	24.902	31.532	42.333	12.033	20.185	29.495
1.03817	0	6.667	31.111	20	14.074	24.583	6.667	5.417	0	7.692	0	0		1.03817	1.167	0	5.714	4.912	18.5	20.31	11.783	26.667	12.709	37	27.81	12.105	13	18.664	10.085	35.214	21.765	26.126	49.5	16.748	26.524	24.242
1.0465	0	4	28.846	20	11.111	25	9.524	0.417	0	5.128	12.857	5.333		1.0465	2.167	0	2.286	2.632	19.5	18.959	23.566	27.167	13.143	37.833	27.048	8.421	12.5	25.219	11.966	36.204	38.235	20.961	53.167	16.911	36.873	20.808
1.05483	0	1.333	30	20	17.037	28.333	16.19	0	0	6.667	18.095	3.556		1.05483	1.833	0.784	0	2.632	23.667	23.721	25.891	21.667	16.534	32.167	27.171	6.842	11	31.409	12.821	47.418	37.451	22.663	47.167	19.675	38.889	19.924
1.06317	0	8.444	37.564	20	27.778	18.54	11.136	0	0	7.692	21.429	21.778		1.06317	0	0	0	2.632	24	17.829	25.426	26.667	17.524	31.667	28.571	5.088	9.833	30.952	16.752	54.975	38.824	32.037	44.333	17.724	41.111	24.444
1.0715	0	13.333	45.94	16.889	27.778	26.595	18.571	0	0	18.462	21.429	4.889		1.0715	0.5	0.196	0	2.632	25.167	17.017	29.922	31.729	15.048	35.833	21.765	12.456	15.833	26.825	18.632	58.291	30.196	36.151	33.5	25.528	42.185	22.02
1.07983	0	13.778	46.667	17.333	30	25	21.905	0	0	12.308	16.19	0		1.07983	0	0.98	0	2.632	28.876	23.492	26.785	33.653	16.762	36.654	24.51	17.018	15.333	29.365	23.077	51.111	39.804	32.222	36.167	16.748	34.566	19.798
1.08817	0	6.667	38.846	10.222	27.778	19.583	21.099	3.333	5	4.103	14.286	4.444		1.08817	0	0.784	0	2.632	22.902	27.305	41.979	40.774	16.571	31.453	32.465	8.07	16.679	21.27	21.538	42.141	37.255	35.905	34.333	15.447	36.566	18.788
1.0965	0	6.667	43.419	14.667	24.074	16.25	15.714	0	3.333	5.128	8.095	3.111		1.0965	0	0.588	0	2.807	21.41	27.442	42.097	41.062	23.042	30.522	40.926	8.07	18.5	25.412	21.88	48.034	40.79	35.135	33.5	20	38.831	16.97
1.10483	0	12	38.333	2.667	21.481	21.667	6.667	2.083	0	7.179	3.81	0		1.10483	0	0	0	0.175	28.333	23.566	35.814	34.484	21.481	31.433	36.571	10.175	18.667	15.61	12.137	47.863	36.203	19.141	29.333	16.911	42.407	31.111
1.11317	0	13.333	31.026	10.667	18.148	21.417	8.095	3.333	0	14.359	8.571	10.222		1.11317	1.667	0.98	0	0	29.167	25.426	27.597	36.604	30.984	32.167	34.476	17.719	20.333	17.499	11.453	31.66	33.868	32.963	29.667	20.325	42.222	33.333
1.1215	0	5.778	36.111	12	22.222	19.167	1.429	9.167	0	9.231	11.905	10.667		1.1215	0	2.941	0	0	29.5	24.961	27.372	38.906	37.127	31.5	29.524	18.07	27.333	18.699	22.393	35.965	37.778	32.217	46.333	23.577	24.259	30.909
1.12983	0	3.111	35.513	12.444	20	6.667	0	12.917	0	22.564	14.286	0.889		1.12983	0	3.725	0	2.456	31.5	21.705	29.387	43.452	41.71	32.167	36.19	18.947	18.333	29.268	29.06	48.686	36.887	43.076	49.137	24.39	20.37	31.717
1.13817	0	4	35.897	29.333	20.37	5.833	0	22.083	7.778	13.333	13.333	1.333		1.13817	0.167	2.941	0	1.053	33.333	17.829	31.783	41.595	47.619	33.333	39.115	35.614	18.145	28.943	30.94	37.944	34.86	41.642	52.03	23.415	28.434	21.616
1.1465	0	0	45.128	17.778	27.778	18.333	0	27.083	1.111	9.744	6.667	3.111		1.1465	0	2.941	0	3.684	22.863	25.426	34.289	46.137	42.037	38.833	37.866	25.263	18.767	34.118	28.205	35.498	32.919	34.76	51.201	23.902	29.143	28.472
1.15483	0	0	35.385	18.667	20.741	26.25	0.952	16.667	1.667	42.051	2.381	0.889		1.15483	0	4.118	0	1.579	31.808	34.013	31.281	43.205	47.958	37.333	34.476	24.386	17.629	34.804	23.932	32.272	35.294	35.37	59.201	26.829	34.353	39.192
1.16317	2.857	0	32.308	26.667	25.556	32.083	6.19	18.333	8.333	38.034	9.524	0.444		1.16317	0	2.745	0	4.035	35.667	35.408	33.368	34.724	42.986	47	46.286	29.123	22.167	28.254	25.128	39.514	36.257	41.111	56.244	27.24	32.627	36.717
1.1715	0	9.333	37.949	20.825	29.259	32.917	4.762	11.667	8.333	16.667	8.095	1.333		1.1715	0	3.725	0	8.421	26.97	24.126	34.688	33.307	31.944	50.321	44.868	27.193	26.5	28.254	22.051	42.73	36.162	49.793	48.538	22.585	27.132	33.958
1.17983	0	9.778	31.325	14.286	28.148	35.417	0	12.917	5	15.556	8.095	10.667		1.17983	0	5.686	0	4.386	32.765	16.91	36.124	34.152	35.339	48.889	38.476	29.55	32.5	31.111	18.803	42.276	32.08	44.515	54.035	18.333	31.481	34.167
1.18817	0	6.667	40.513	20.952	29.63	29.583	0	10.417	0	14.359	7.143	11.111		1.18817	0	0.784	0	1.754	35.167	22.408	35.781	39.122	41.54	53.581	37.361	30.204	28.833	31.003	19.487	34.647	19.43	46.56	50.91	12.358	35.487	37.675
1.1965	0	1.333	31.282	27.619	31.111	25.833	0	9.583	0	12.094	16.19	8.889		1.1965	0	2.157	0	0	33.132	22.679	36.26	40.54	39.582	47.134	37.944	33.509	26.154	27.336	21.026	32.479	14.949	57.222	59.897	15.285	23.916	25.262
1.20483	0	0	29.744	28.889	23.333	29.583	0	4.167	0	14.701	32.857	7.111		1.20483	0.167	0	0	1.228	32.667	18.021	34.068	33.944	43.148	48.29	48.122	31.987	32.184	35.397	19.568	32.919	13.131	56.83	56.451	19.675	28.663	27.567
1.21317	0	0	26.667	29.873	16.688	20.278	0	17.5	0.556	10.256	34.286	0.889		1.21317	1.667	0.392	0	1.228	29	15.943	31.373	32.439	45.406	41.574	58.333	37.658	34.5	29.667	22.982	36.703	9.091	44.006	51.138	17.236	31.162	33.253
1.2215	0	0	24.615	19.048	25.882	18.333	0	19.167	7.778	15.897	34.762	0		1.2215	0	0	0	2.456	28	18.295	23.455	34.689	36.508	45.47	58.115	36.216	34.5	28.455	20.288	36.581	18.182	49.826	53.912	16.053	25.926	28.224
1.22983	0	0	23.077	14.413	21.852	25.833	0	24.167	2.222	18.462	39.048	4.444		1.22983	0	0	0	0.877	28.5	21.24	27.423	33.574	31.556	43.573	54.213	35.903	37.667	36.585	17.094	38.394	25.924	46.251	57.383	12.776	25.048	26.465
1.23817	0	1.778	27.692	19.111	17.778	20	1.905	17.5	0	8.205	28.571	4.444		1.23817	0	0.196	0	0	24.145	19.225	35.366	31.529	26.667	43.117	54.964	28.151	33.667	41.289	18.803	31.993	30.784	58.667	48.44	13.317	24.661	30.505
1.2465	0	1.333	27.479	23.111	17.407	4.167	6.19	13.333	0	12.821	10	0		1.2465	0	0.196	0	0	26.573	17.054	34.711	29.078	26.81	48.12	51.345	25.439	23.667	38.285	21.538	31.282	27.451	48.212	46.561	13.496	28.704	26.465
1.25483	0	0	25.385	21.778	28.148	0.417	0	12.917	0	21.538	6.19	0		1.25483	0	0	0	0	35.167	20.775	37.479	34.553	36.44	43.414	56.833	27.871	17.667	38.545	21.368	31.831	27.059	41.209	37.705	13.333	25.185	24.04
1.26317	0	0	16.41	18.667	32.636	7.083	13.81	11.667	0	21.026	13.81	0.444		1.26317	0	1.373	0	0	26.333	23.566	36.667	43.112	36.863	50.932	46.902	20.556	14.667	46.992	21.538	40.526	29.216	38.665	38.038	16.187	20.37	29.091
1.2715	0	3.556	22.564	11.556	37.495	30	21.429	12.5	0	24.103	20	14.222		1.2715	0.5	1.765	0	0	29.833	27.442	31.649	40.695	39.339	52.039	50.179	27.963	14.641	36.439	26.154	44.516	33.137	37.942	42.165	15.772	22.222	24.646
1.27983	0	11.111	24.615	7.746	37.778	18.75	20.952	12.5	0	8.718	19.524	15.111		1.27983	0	3.529	0	0	34.667	34.74	38.04	37.487	41.008	50.59	41.806	28.831	18.5	35.734	25.299	37.467	31.765	37.272	42.873	20	23.704	22.443
1.28817	1.429	4	28.718	7.143	32.745	20.833	4.286	9.583	0	9.231	14.762	3.111		1.28817	0	0.588	1.905	0	35.667	29.767	33.717	34.14	41.524	45.983	41.183	26.705	22.278	29.228	26.496	28.007	31.602	42.661	37.536	13.171	23.492	22.67
1.2965	0	0	18.974	7.143	19.107	16.667	0	11.667	0	8.718	16.667	4.889		1.2965	0	0	0	0	31.772	27.752	22.063	33.782	40.254	51.466	57.367	29.79	20.709	31.622	30.427	30.648	29.804	46.995	40.891	20.813	35.048	20
1.30483	7.143	0	18.462	7.143	18.824	4.583	0	22.917	0	4.615	16.667	3.556		1.30483	0	3.333	0	0.351	30.351	29.922	18.062	39.829	37.444	54.517	57.38	26.127	17.5	26.504	20.855	33.284	28.824	47.821	50.162	15.772	26.286	19.192
1.31317	0.952	5.333	11.795	11.429	21.046	7.5	0	22.917	0	0	11.429	0		1.31317	0	1.765	0	2.632	34.051	32.392	30.698	42.2	40.19	55.868	57.976	27.592	17.833	30.67	13.846	33.851	32.745	37.585	52.034	11.22	29.656	9.697
1.3215	0	22.667	15.385	17.524	27.407	8.333	0	25.833	0	9.231	11.429	0		1.3215	0	0.392	0	5.263	26.496	25.238	28.837	47.692	43.185	44.534	60.588	35.969	22.167	30.476	16.581	32.907	39.608	37.265	50.706	15.447	36.852	10.505
1.32983	0	31.556	20.299	20.889	27.778	7.083	8.095	19.583	0	11.282	14.286	10.667		1.32983	0	0	1.905	5.263	23.581	30.731	23.101	42.262	45.37	31.205	58.499	32.863	22.927	29.683	23.419	33.432	31.373	40.374	53.222	18.862	32.778	18.586
1.33817	0	15.556	14.359	21.683	24.009	15	25.714	12.083	0	0	15.714	7.111		1.33817	0	1.373	2.857	0.702	22.735	39.199	28.527	41.947	41.111	35.667	67.95	37.207	21.496	32.063	26.838	38.961	27.225	43.95	56.761	21.463	30	10.909
1.3465	0	19.111	8.205	21.175	19.935	22.083	26.19	17.917	0	0.513	7.619	0		1.3465	0	0.784	2.476	0.175	26.725	36.984	30.144	40.403	39.156	39.333	70.51	18.521	20.5	30.317	28.205	43.419	35.288	50.34	49.99	20.797	37.037	6.869
1.35483	0	24.889	13.205	15.111	26.928	24.167	35.714	15.417	1.667	14.872	13.81	0		1.35483	0	1.765	4.381	0.175	29.321	33.651	28.862	40.538	41.333	40.833	72.252	19.123	20.833	34.603	37.778	40.011	37.255	59.496	53.19	22.711	29.444	6.667
1.36317	0	16.889	16.667	7.111	26.928	22.5	30.586	12.917	5	8.205	21.429	5.778		1.36317	0	1.569	0.381	1.579	24.038	41.082	36.841	42.842	41.333	43.5	66.376	19.123	15.5	30.635	42.393	38.218	24.902	51.697	57.718	14.5	28.333	10.101
1.3715	0	15.111	19.444	6.667	23.856	10	23.333	17.083	0	15.897	19.524	0		1.3715	0	0.98	0.19	0.702	26.188	47.63	37.913	41.528	45.841	41.833	58.583	18.772	14	30.995	39.829	43.687	30.41	41.587	48.799	14.049	27.778	8.687
1.37983	4.286	14.667	25	7.556	18.889	8.75	4.286	1.25	0	7.179	19.524	4		1.37983	0	0.392	0	0.702	32.197	44.341	28.816	44.058	35.87	35.85	51.462	18.421	14.833	34.506	30.94	41.982	25.294	40.549	38.511	12.167	26.481	11.313
1.38817	0	31.111	32.65	12.889	20.741	16.25	7.143	4.583	6.111	0	14.286	1.333		1.38817	0	0.588	0	0	22.833	39.535	31.743	48.632	32.353	37	52	11.935	22.167	32.803	24.274	53.153	22.941	36.202	43.561	10.667	22.222	6.061
1.3965	0	17.333	30.769	16.889	13.333	18.75	7.143	12.5	8.333	0	19.524	0		1.3965	0	0	0	0	18	37.674	34.286	52.654	27.109	40.167	49.61	20.251	19.833	27.46	22.564	49.91	15.882	45.754	50.311	7.146	17.593	3.03
1.40483	0	14.667	30.769	22.667	12.593	18.75	0.952	12.5	7.222	0	22.381	0		1.40483	0	2.549	0.381	0.877	22.833	42.171	43.26	54.179	28.704	45.833	54.142	26.615	18.667	17.46	23.932	44.685	12.157	56.002	56.977	12.033	15.556	4.04
1.41317	0	6.667	28.333	26.032	20.741	16.25	15.238	6.25	0	15.897	22.967	0		1.41317	0.167	1.961	0.19	0	28.333	45.657	42.23	42.527	25.963	43.333	53.395	31.005	20.667	20.476	28.596	41.149	8.039	61.783	52.292	19.35	14.487	2.02
1.42167	0	4	28.462	31.206	20.741	26.667	15.238	12.5	0	21.026	6.044	8		1.42167	0	0.784	2.857	0	23.077	50.876	42.171	48.748	35.926	48.167	53.798	29.474	21.333	29.001	28.317	43.485	15.49	59.138	51.368	17.236	12.037	4.04
1.43	0	11.111	25.641	24.957	18.148	29.583	0	5	0	4.615	18.095	19.556		1.43	0.5	0	2.857	0	26.5	50.429	40.62	44.177	36.852	48.667	46.637	29.806	30.333	35.285	33.943	40.749	14.314	56.115	52.987	9.268	21.81	7.677
1.43833	0	10.667	23.077	26.393	15.556	32.917	1.905	9.583	0	6.154	7.143	24.444		1.43833	0	1.176	2.857	0	26.167	51.03	31.761	42.488	28.407	35.581	32.484	25.946	30.167	29.606	34.955	33.131	18.431	57.451	56.585	16.098	26.111	16.364
1.44667	0	18.222	20	24.476	7.407	25.417	7.143	6.25	0	0.513	2.381	30.857		1.44667	0.167	0.392	2.857	0	20.167	38.199	36.017	46.406	28.323	40.833	39.59	18.506	20.333	24.541	31.053	32.479	15.882	60.531	57.598	16.098	15.741	15.152
1.455	0	16	26.154	20.159	11.111	13.333	0.476	5.417	2.222	4.103	2.381	23.937		1.455	0	0	2.857	0	21.167	40.439	32.898	53.09	30.185	43.077	39.809	24.912	27	27.642	33.279	35.556	22.353	65.489	52	17.073	13.519	13.333
1.46333	0	24.444	15.897	20.857	5.926	1.667	2.381	2.083	0	6.667	0	8		1.46333	0	0	2.857	0	22.333	41.4	32.131	43.685	22.963	48.034	46.101	33.461	35.167	22.927	36.968	34.656	13.922	71.679	56.628	18.972	11.111	21.616
1.47167	0	26.667	17.949	24.286	8.148	0	12.857	17.5	0	0	1.429	10.667		1.47167	0	0	2.857	0	21.667	40.856	35.316	43.933	21.852	46.667	44.723	34.756	25.167	30.927	37.908	35.735	12.353	60.027	47.623	23.825	20	15.96
1.48	0	13.778	15.385	37.143	3.333	0.833	12.857	25	5	4.103	7.143	2.222		1.48	0.5	0.588	2.857	0	21.833	44.393	39.775	47.506	25.926	38.316	34.084	27.658	31.667	24.167	29.231	42.213	10.98	64.058	46.937	22.15	22.873	14.141
1.48833	0	4.444	16.923	44.889	5.926	12.917	8.571	22.5	16.111	0	9.048	11.111		1.48833	2.833	0.98	2.857	0	29.167	46.755	37.988	54.876	23.519	29.167	30.308	27.368	24.833	25.47	21.88	47.049	10.196	61.05	51.31	20	20.926	16.376
1.49667	0	8	23.077	45.143	0	14.583	0	10.833	6.111	9.744	5.714	5.778		1.49667	5	0	3.048	0	42.167	44.453	34.574	56.41	28.148	36	34.857	29.497	26.667	25.476	27.085	42.384	14.314	66.074	56.011	21.301	18.148	20.404
1.505	0	10.667	20	37.619	0	6.667	0.476	18.75	0	7.692	5.238	16		1.505	0	0	4.952	0	34.547	41.281	29.779	60.486	38.148	29.667	28.342	24.912	23.167	25.238	22.928	44.175	11.961	63.192	51.868	23.252	20.556	12.525
1.51333	0	3.556	7.692	31.841	0	1.25	1.429	12.917	0	0	3.333	12.889		1.51333	0	0	2.857	0	24.833	42.063	25.087	68.361	36.111	29	33.58	18.596	18.333	24.603	13.504	37.454	7.451	57.817	42.593	9.268	14.984	5.051
1.52167	0	4.889	7.692	35.111	3.704	4.167	0	8.333	5	0	2.381	11.556		1.52167	0	0	3.81	0	19.333	32.063	19.535	58.983	35.926	34	28.762	12.281	8.333	17.619	20	33.999	3.529	51.688	38.901	4.39	8.333	0.606
1.53	0	0	4.103	20	5.556	2.083	0	4.583	0	0	4.762	12.889		1.53	0	0	1.143	0	11.5	36.696	17.054	61.291	30.37	34	24	10.526	12.167	10.794	17.265	24.103	0.392	41.346	27.665	7.154	2.778	0
1.53833	0	12	2.051	10.667	1.111	0	0	1.25	0	0	7.143	4		1.53833	1.667	0	0	0	15.5	24.341	12.868	68.376	19.63	23.333	20.571	3.333	22.5	2.54	6.838	10.085	4.902	30.37	23.018	7.48	6.481	2.02
1.54667	0	0.444	0	13.333	4.444	10	0	0	0	0	7.143	0		1.54667	0.333	0	0	0	10.5	31.008	13.798	63.06	23.519	24.333	20.952	8.07	30.333	6.19	11.453	4.103	3.725	25.305	22	5.203	7.407	0.404
1.555	0	1.778	0	14.667	2.593	12.5	3.81	3.75	0	0	7.143	0		1.555	0	1.373	0	0	3.667	27.907	11.163	44.073	19.259	20.167	8.381	12.982	12.167	5.079	12.821	7.179	0.98	27.748	19.833	0.325	5.37	0
1.56333	0	4	0	4.889	3.333	13.333	1.429	0.833	0.556	0	7.143	0		1.56333	0	4.902	0	0	6.5	24.186	7.597	34.137	21.111	11.333	9.333	18.596	11	4.444	11.795	4.103	0	19.279	20.833	0	1.296	0
1.57167	0	0.444	0	6.667	14.815	10.417	0	2.5	6.111	0	7.143	0		1.57167	0	0.784	0	0	8	14.419	5.271	28.167	16.111	6.333	4.952	15.088	11.667	4.603	12.137	2.735	0	22.162	20.333	2.276	1.111	0
1.58	0	0	4.615	13.333	2.593	0	0.476	5.833	0	0	7.143	0		1.58	0	0.784	0	3.158	1.333	11.938	4.341	32.667	16.296	13.833	10.286	10.877	10.667	0.952	16.068	0.342	2.941	15.135	22	2.439	1.111	1.616
1.58833	0	0	4.615	15.556	1.111	0	4.286	2.5	0	0	7.143	0		1.58833	0	2.941	0	4.561	2.333	13.643	11.783	39.5	5.926	17.5	2.476	7.193	8.667	1.746	9.744	1.538	4.706	18.198	13	3.74	4.63	3.03
1.59667	0	2.222	13.846	21.778	8.519	0	0	0	0	0	7.143	0		1.59667	0	2.941	0	5.263	5.833	13.333	5.736	33	8.889	20	6.095	9.649	4.5	4.127	14.701	2.906	1.176	15.315	9.167	4.065	3.333	3.03
1.605	0	0	17.949	12.444	1.481	15.417	0	0	0	0	7.143	0		1.605	0	1.569	0	2.807	2.833	9.922	8.217	25.705	12.778	18.667	5.333	6.667	8.833	5.873	12.479	7.179	2.353	18.739	10	2.439	7.222	2.626
1.61333	0	0.444	7.692	7.111	3.704	5	6.19	0	0	0	4.286	0		1.61333	0	0	0	2.105	2.833	13.178	9.612	26.808	4.63	15.333	0.381	7.544	1.167	10.476	15.214	6.154	0.196	11.351	6.667	2.602	4.444	1.818
1.62167	0	0.444	0	4.444	3.704	0	0	0	0	0	0	0		1.62167	0	0	0.19	3.333	0.667	13.643	2.481	26.338	5.741	7.5	4	8.947	1.5	4.762	10.94	2.906	0	10.991	9.5	2.764	2.037	0
1.63	0	6.222	3.59	0.889	15.185	0	0	0	0	0	0	0		1.63	0	1.176	0	4.035	6.167	9.457	5.426	29.667	6.111	12.667	3.238	8.421	3	3.492	8.718	2.393	1.373	11.532	9.667	1.626	3.519	0
1.63833	0	2.667	5.641	5.333	12.222	0	0	0	0	0	0	0		1.63833	0.833	0.196	1.524	4.386	6.167	3.721	11.473	35.333	8.333	18.167	12.952	7.544	9	3.333	8.547	0	1.176	11.712	9.5	3.089	2.778	0.404
1.64667	0	0	6.667	13.333	6.667	0	3.333	0	0	0	0	0		1.64667	3	0.98	2.857	3.158	2.833	12.248	8.682	37	6.481	15.333	5.143	7.895	6.167	2.857	6.325	0.855	1.176	14.054	10.667	3.106	3.333	0
1.655	0	0	4.103	6.667	1.481	0	3.81	0	0	0	0	0		1.655	0.667	1.765	2.857	4.386	1	11.628	2.171	36.167	5.741	12.833	6.095	6.667	2.667	7.46	4.957	0	0.588	8.649	19.333	4.248	0.741	0
1.66333	0	0	6.667	7.111	0	0	6.19	0	0	0	0	0		1.66333	0.833	2.941	2.857	6.842	0.5	15.659	7.442	29.833	3.148	2.667	5.524	3.86	2.667	8.254	2.564	1.197	2.549	6.126	15.167	4.228	1.481	0
1.67167	0	0	2.564	6.667	0	0.833	11.429	0	0	0	0	0		1.67167	0	0	2.667	7.544	3.333	6.357	5.116	27	1.481	2	1.714	5.965	2.667	1.27	3.419	0.342	5.098	6.126	9.167	0	1.111	0
1.68	0	2.222	5.128	5.778	0.741	6.25	0.476	2.917	0	0	0	0		1.68	0.167	1.961	0	5.263	3.167	4.961	3.411	20	1.667	9.667	6.857	4.035	0.667	1.587	4.957	0.171	2.941	6.486	5.5	0	3.889	0
1.68833	0	0	8.718	0	1.111	0	0	2.5	0	0	1.905	0		1.68833	0.5	4.314	0	6.667	8.5	8.992	5.581	19.167	5.185	11	7.048	5.439	2.333	6.508	1.88	5.128	0.98	12.072	0.833	0.976	2.222	0
1.69667	0	0	14.359	0	1.111	6.25	0	0	1.667	0	0	0		1.69667	2.167	5.49	0	4.561	5.5	2.791	1.24	17.5	8.704	8.167	0.381	1.579	5.667	9.683	4.786	3.248	5.882	13.153	3.333	1.138	1.852	0
1.705	0	0	0.513	4	4.815	1.667	0	0	5	0	0	0		1.705	2.5	1.765	0.571	1.754	3.167	1.705	0.155	22.333	3.333	4.667	0.19	2.105	5.667	4.762	5.128	0.171	0.98	8.468	8.833	4.878	4.63	2.424
1.71333	0	0	0	0	5.185	2.917	0	2.917	2.778	0	0	0		1.71333	0.5	1.176	0.19	0	5.333	7.442	6.667	16	2.407	4.667	6.095	4.386	1.333	5.556	7.179	0.855	0	7.568	5	5.041	0	0
1.72167	0	2.222	12.308	0	3.333	0	0	2.083	0	0	0	0		1.72167	0.333	3.529	3.619	0	8.667	11.163	5.736	21.833	2.963	10.333	1.143	1.053	0	2.698	3.419	1.368	0	12.973	7.833	0.976	0	0
1.73	0	0	15.897	0	1.481	0	0	0	5.556	0	0	0		1.73	0	6.078	3.048	0	1.667	10.233	6.202	24	0.37	5.667	5.714	0	0.667	0.952	3.932	0.342	0	8.108	5.833	2.439	0	0
1.73833	0	0	7.179	1.778	3.704	0	0	0	13.889	0	0	0		1.73833	0	10.98	3.238	0	1	6.357	0.62	24.167	2.778	9.833	13.524	0	0	0.476	3.419	0	0	9.369	1.667	2.439	2.037	0
1.74667	0	0	8.718	0.444	7.778	0	2.381	0	11.667	0.513	0	0		1.74667	0	7.059	2.857	0	1.333	1.86	0	17	7.963	7.333	4.952	1.754	0.333	1.111	5.812	4.444	0	14.595	1.333	1.626	0.37	0
1.755	0	7.111	1.026	0.444	19.63	0	7.143	0	8.333	0	0	0		1.755	0	4.314	3.238	3.509	2.167	0.93	0	21.167	6.667	8.333	15.048	4.035	3.333	3.968	5.641	2.051	0.196	14.234	0.5	0.976	0	1.818
1.76333	0	3.111	0	0	11.111	1.25	2.381	0	8.333	0	0	0		1.76333	0	3.725	0	2.281	1.833	4.341	1.86	28.5	2.593	10.167	9.714	3.158	2.333	6.508	6.838	0.342	0.392	8.649	3.833	0.813	0.741	1.212
1.77167	0	0	6.154	0	3.704	7.917	0	2.917	5	0	0	5.778		1.77167	0	3.137	0	1.404	4	1.55	4.186	30.333	0	9.833	4.952	2.632	4.167	2.857	9.402	0	0.98	3.964	0.667	2.439	3.519	0
1.78	0	0	0	7.111	12.963	4.167	0	0.417	6.111	0	0	1.778		1.78	0	1.373	0	2.632	4.333	2.326	4.806	25	0	9.667	2.857	2.105	4.5	1.429	5.299	0	0	6.667	1.333	0.325	2.037	0
1.78833	0	0	0	5.333	5.556	0	13.333	0	7.778	0	0	0		1.78833	0.167	1.176	1.333	2.632	5.833	4.961	2.791	25.667	0.926	6.667	1.143	0.877	0	1.111	7.35	0.171	0	14.955	7.833	0	0.37	0
1.79667	0	0	0	4.444	7.407	1.25	3.333	0	0.556	0	0	4.889		1.79667	3	1.961	0.381	2.105	5.667	1.55	2.946	23.333	3.148	5.833	7.429	0	0	1.111	10.256	0	0	10.27	5.333	0	1.296	0
1.805	0	2.667	8.205	0.889	3.333	2.5	0	0	2.222	0	0	5.333		1.805	0	0	0	2.632	4.167	5.271	8.527	15	6.667	4.833	4.762	0	0.5	6.349	8.889	0.513	0	6.486	5	0	4.815	0
1.81333	0	0	6.154	0.889	3.333	4.167	0	2.5	8.333	0	0	0		1.81333	0	0	0.952	2.456	2.833	7.597	2.016	15	8.148	3.333	0	0	1.167	2.063	9.06	0.513	0	6.847	6	0	3.148	1.212
1.82167	0	0	22.564	3.556	4.074	0	0	8.75	8.333	0	0	0		1.82167	0	0	3.429	4.737	0.833	2.171	2.481	12.333	5	4.333	0.381	0	0.167	5.079	10.256	0	0	11.532	3.333	0	3.889	3.838
1.83	0	0	16.923	6.667	6.667	2.083	0	4.583	8.333	0	0	0		1.83	2.5	0.98	5.714	0.702	2	3.101	4.961	5.333	6.481	11.167	4.571	0.351	1.667	6.508	16.41	0.171	0	10.27	4.667	0	2.778	1.414
1.83833	0	0	15.385	6.667	5.185	0	0.476	3.333	8.333	0	0	0		1.83833	3.667	3.137	5.714	0	0.5	4.341	4.341	2.333	9.074	4.167	4.19	2.982	3.5	5.397	12.65	6.838	0	5.045	3	0.65	2.407	1.212
1.84667	0	0	3.077	4.889	9.259	0	0	5.833	8.333	0	0	0		1.84667	0.167	0	3.81	0.702	4.5	7.597	4.186	2.5	6.296	4	10.667	4.737	2.5	5.238	10.769	2.222	0	5.045	3.167	2.114	0.741	1.818
1.855	0	0	0	0	6.296	0	0	3.333	8.333	0	0	1.778		1.855	2	1.765	0.762	1.228	6.333	4.186	7.752	8.667	0.556	8.667	6.667	3.333	0.833	3.175	14.53	1.368	0	5.946	4.167	3.089	1.667	1.818
1.86333	0	0	0	0	2.963	0	0	2.917	3.889	0	1.429	1.333		1.86333	0.5	4.118	0	0.351	3.833	4.961	3.721	13.333	0.741	7.5	5.524	2.281	0	0	16.064	0	0	6.306	8.833	3.089	0	6.061
1.87167	0	0	0	0	0	0	0	0.417	0	0	0	0		1.87167	0	4.706	0	1.93	1.833	4.496	1.085	9.333	3.889	5.167	6.667	1.93	2.833	0.635	16.1	0.171	0	3.964	6.167	0.163	0	0.808
1.88	0	2.667	8.205	4.444	1.481	0	3.333	0	4.444	0	1.429	0		1.88	0	2.941	0	5.088	0.667	7.287	0.155	15	5.556	9.167	9.905	1.93	0	0.476	9.231	0.684	0	2.162	5	1.301	0	2.626
1.88833	0	1.778	5.128	0	1.852	0	7.619	0	8.889	0	2.857	0		1.88833	1	1.961	0	7.193	5	10.388	0.62	9.167	7.407	3.167	8.952	0.351	2	3.175	7.009	2.564	0	0.721	6.667	0	0	0.202
1.89667	0	0	4.103	4	0.741	0	0	0	2.778	0	1.429	0		1.89667	0	0.196	0	9.474	0.833	2.481	1.085	4.333	12.407	4	4.571	0	3.833	6.984	8.376	2.564	1.569	0	5	0	1.481	0
1.905	0	3.556	3.077	8.444	0.741	0	0.476	0	0	0	6.667	0		1.905	0.167	0	0	7.895	0.833	3.256	8.217	3.667	11.667	4.833	0.762	0	0.667	5.556	9.231	4.615	5.882	0	2.5	2.276	2.593	0.606
1.91333	0	0	11.282	2.667	4.074	0	0	0	0	0	0	0		1.91333	0	0	0	5.263	1.667	4.031	3.101	3.833	16.852	8.333	4.952	2.105	0.333	9.365	10.427	3.248	0.784	0.901	5.5	2.764	3.148	0.606
1.92183	0	2.222	16.923	0	8.519	0	3.333	0	0	0	0	0		1.92183	0	0	0	4.035	2.667	9.767	2.946	10	11.852	4.667	7.048	0.351	0.833	6.508	10.598	3.248	1.373	0.901	5.5	6.504	3.519	0
1.93017	0	0.444	13.333	0.444	9.259	0	5.238	0	0	0.513	0	0.444		1.93017	0	4.314	4.381	4.561	0	8.372	0.775	11.833	12.222	6.333	1.524	0.526	0.833	5.873	7.35	3.248	1.765	4.865	6	3.415	2.407	0
1.9385	0	0	7.692	4.889	3.704	0	1.429	0	0	0	0	0		1.9385	0	2.157	2.286	2.807	0	3.876	2.946	10.333	7.963	4.667	0.762	6.14	0.833	6.349	3.419	0	0	5.405	11.833	3.74	0.185	0
1.94683	0	0	12.821	3.556	4.074	0	2.857	0	0	0	0	0		1.94683	0	0.784	1.333	3.333	0.5	1.705	6.512	8.5	5.185	11.5	3.81	8.07	1.333	3.651	8.718	0	0	5.766	14.833	2.927	1.667	0
1.95517	0	0	5.641	0	2.963	0	3.81	0.417	6.667	0	0	0		1.95517	0	0	0.571	1.053	1.833	1.86	1.705	5.167	4.259	5.833	1.905	5.263	3.833	0.317	10.427	0.855	0	7.568	10.833	0.813	1.111	0
1.9635	0	0	6.154	0	7.037	0	0	3.75	6.667	0	0	0		1.9635	0	0	2.095	3.158	0.833	2.946	4.341	6	2.778	11	5.143	1.404	7.833	2.381	8.205	1.368	0	5.766	9	4.228	2.963	0
1.97183	0	0	0	0	1.111	2.083	0	0	0	1.538	0	0		1.97183	0	1.176	2.286	2.982	0.5	5.271	4.651	13.333	5.556	9.167	4	1.754	4.667	2.381	5.641	2.393	0	5.586	5.833	5.203	2.778	0
1.98017	0	0	0	0	6.667	0	0	0	11.111	2.051	0	0		1.98017	0.167	1.176	2.857	2.982	2.167	2.481	1.86	11.333	7.222	2	5.905	3.684	0.833	6.508	3.761	1.538	0	3.964	2.167	6.667	1.296	0
1.9885	0	0	1.026	0	1.481	6.667	0	0	10.556	0	0	0		1.9885	0	0.588	2.667	2.105	5	7.597	1.395	4.333	0.185	3.833	8.381	4.737	0.667	10.476	7.009	2.222	1.569	3.784	1.667	6.504	5.556	2.424
1.99683	0	0	0	0	0.37	0	0	0	6.667	0	0	0		1.99683	0	2.157	2.857	0	3.167	15.349	0.465	5.333	6.481	7.167	10.095	3.509	0.667	5.238	5.812	0.513	0	7.928	1.667	5.854	9.074	5.455
2.00517	0	0	2.051	3.111	0	4.167	0	0	0	0	0.952	0		2.00517	0	0	2.476	0	0	8.217	0.93	4.5	8.333	15.167	6.286	3.86	1.167	7.302	2.735	0	0	6.306	3.667	4.228	0.741	3.434
2.0135	0	0	0	0.444	2.963	2.083	1.429	0	4.444	0	0.476	0		2.0135	0	1.569	2.857	0	1.667	6.512	0.775	7.333	9.815	16.333	2.857	5.965	0	3.333	2.906	0	0	2.883	5.333	9.268	1.481	3.232
2.02183	0	0	3.59	0	5.926	4.167	2.381	0	1.667	0	0	0		2.02183	0	0	2.857	1.579	3.667	4.186	1.705	3.333	14.444	4.833	2.857	4.561	0.167	5.556	2.564	2.222	0	5.766	4.833	5.203	6.852	0
2.03017	0	0	4.615	0	0	0	0	0	5	0	0	0		2.03017	0	0	2.857	1.404	2.667	0	2.016	8.333	13.148	1.833	6.667	3.509	1.667	3.81	2.735	1.026	2.941	8.468	3.5	4.715	9.444	0
2.0385	0	0	7.179	0	0	0	0	0	1.111	0	0	0		2.0385	0	2.549	2.857	0	4.5	1.86	2.326	17.833	5.741	2.167	7.429	0.877	7	2.698	4.274	6.325	0.196	6.126	3.167	2.439	9.815	0
2.04683	0	1.778	1.026	0	0	0	0	0	0	0	0	0		2.04683	0	0.392	2.857	0	5.333	4.651	0.93	5.333	2.593	1.167	7.429	0	4.833	0.952	3.59	0.342	0	5.586	0.333	1.301	5.37	0
2.05517	0	2.222	3.59	0	3.704	0.417	0	0	0	0	0	0		2.05517	0	1.373	2.857	0	8.833	0.62	0.31	15.333	1.481	5.667	2.095	1.754	1	6.19	4.274	0	0	5.766	3	3.089	2.407	0
2.0635	0	1.778	0	0	1.481	6.25	6.667	0.417	5.556	0	0	0		2.0635	0	0.392	0.381	0	10.167	4.186	1.86	19.333	1.852	4.5	2.476	2.281	1.667	2.222	5.47	1.368	0	6.847	6.167	1.138	4.63	0
2.07183	0	3.556	0	0	0	6.25	1.905	0	0	0	0	0		2.07183	0	0.588	0	1.754	4.833	4.651	3.101	15	1.111	5.167	0.381	3.86	0.667	1.429	5.812	0.855	0	2.883	3	1.138	3.889	0
2.08017	0	1.778	0	0	0	6.25	0	0	7.778	0	3.333	0		2.08017	0	1.176	0	0	2.5	5.116	0.62	6.167	0.926	10	2.095	6.491	0	2.063	7.692	0.171	0	5.586	1.667	1.951	2.778	0
2.0885	0	0	4.615	0	0	6.25	0	0	8.333	0	1.429	0		2.0885	0	0	0.762	0	4.5	3.411	2.946	10.333	1.852	1.333	2.286	8.07	0.667	4.921	7.009	2.564	0	6.306	0.167	0	4.074	0
2.09683	0	0	5.128	0	0	6.25	0	0	8.333	0	0	0		2.09683	0	0.392	2.857	0	2.833	3.876	1.86	12	0.37	2	0	8.246	0	3.651	6.325	1.368	0	5.405	0	0	5.926	0
2.10517	2.857	0	0	0	0	6.25	2.857	0	6.111	0	0	0		2.10517	0	0	2.286	0	2.167	7.907	4.961	7.667	0	3.333	0.571	7.544	0	6.032	4.444	0	1.176	3.784	2	0	7.407	0
2.1135	13.81	0	0	0	0	6.25	3.81	0	6.111	0	0	0		2.1135	0	1.765	2.476	0	3.167	7.597	2.171	6	0.37	7.5	0.952	5.789	4.833	7.46	3.761	0	0	4.144	2.833	0	4.074	0
2.12183	0.476	1.333	0	0	0	2.083	0	0	4.444	0	0	0		2.12183	0	5.49	2.857	0	3	2.326	2.481	6.333	2.963	5.5	2.286	3.86	2.667	5.079	5.812	0	0	3.063	0.833	1.138	0.37	0
2.13017	0	0	2.564	0	0	4.167	2.381	0	16.667	4.103	0	0		2.13017	0	2.353	2.286	0	2.167	0	1.55	11.667	1.296	7	0.381	0.175	3.333	5.238	6.154	0	0	2.703	2	2.602	0.741	1.01
2.1385	0	2.667	4.103	0	0	2.083	4.286	0	7.222	0	0	0		2.1385	0.5	2.745	2.667	0	0	1.86	5.581	7.833	0	4.667	4.19	0.702	0	6.825	7.009	0	0	2.703	5.333	2.439	1.111	0.606
2.14683	0	2.667	3.077	0	0.741	0	0	0	6.111	0	0	0		2.14683	0	4.314	1.524	0	1.667	5.116	5.271	9.5	0	3.833	1.143	0	3.872	4.444	6.154	0	1.765	3.423	3.167	1.951	1.111	0
2.15517	0	0.444	0	0.444	0	0	1.429	0	0	0	0	0		2.15517	0	5.882	2.857	0	0.833	3.876	4.341	11.833	0	6.667	3.048	2.105	2.53	1.111	5.812	2.393	9.804	3.784	2.333	0	2.778	0
2.1635	0	0	0	6.667	0.741	0	0.952	0	8.333	1.026	0	0		2.1635	0	5.098	2.857	0	2.333	4.961	3.101	7.5	2.593	4.167	0.952	3.684	0.833	6.032	4.957	0.855	1.961	3.964	2.167	0	2.593	0
2.17183	0	0	0	5.333	6.296	0	3.333	0	7.273	0	0	0.889		2.17183	0	0.392	2.857	0	7.5	10.233	1.705	4.167	2.963	2.333	5.524	0.702	1.167	4.921	4.786	0	0	6.306	0.833	0	0.185	0
2.18017	0	0	0	1.333	4.815	0	0	0	4.495	0	0	0		2.18017	0	2.353	2.857	0	4.833	1.395	4.651	3.833	2.037	3.333	0	0	0.833	6.19	4.103	0	0	1.261	0.167	0.163	0.185	0
2.1885	3.81	0	3.59	0	7.407	0	0	0	5.556	0	0	0		2.1885	0.333	2.353	2.857	0	2.833	4.961	3.721	3.5	0	6.333	2.286	1.754	2	5.556	1.026	0	0.196	0.541	0	1.301	0	0
2.19683	0	0	8.718	0	3.333	0	4.286	8.75	0	0	0	0		2.19683	5.333	1.961	2.857	0	0.333	7.752	6.667	4.833	0	2.5	0	4.211	3.5	5.556	2.222	0	1.569	0.18	0	4.878	0	0
2.20517	0	0	0	2.222	1.111	0	0	7.5	0	1.026	0	0		2.20517	2.167	0	2.857	0	3.333	2.946	4.651	2.333	0.556	6.833	1.524	6.842	0.167	5.556	3.077	1.538	0	0	0.333	4.878	0	0
2.2135	0.476	0	4.103	0	0	0	0	5.417	0	1.026	0	3.111		2.2135	0	0	2.857	0.351	5.833	8.372	1.705	5.333	2.222	5.667	2.667	9.123	0	4.444	4.274	3.761	1.176	1.622	0	4.878	0	0
2.22183	0	0	8.718	0	0.741	0	0	13.75	0	0	0	0		2.22183	0	0	2.667	0	5.333	7.752	0	3.833	2.037	4.5	0.571	5.088	0.167	5.556	3.761	0	0	0	1.667	5.366	1.667	0
2.23017	0	0	3.59	0	1.852	3.75	0	12.5	0	0	0	0		2.23017	0	0	2.857	0	2.5	1.24	2.016	3.833	0.926	2.5	0.952	1.93	1	0.635	3.248	1.026	1.176	0	4	3.252	1.481	0
2.2385	0	0	7.179	0	0	1.25	0	4.583	0	0	0	0		2.2385	0	0	2.857	0	0.167	4.651	0.465	3.5	1.852	3.5	2.667	2.982	2	2.381	4.786	0	0	0	3.5	2.439	0	0
2.24683	0	0	10.769	0	0	0	6.667	4.167	6.667	0	0	0.889		2.24683	0	0	2.857	0	1.333	1.395	1.705	12.667	1.111	1.5	0.19	2.807	9.167	2.063	7.009	0	0	1.441	6.167	0.813	0.185	0
2.25517	1.429	0	17.436	1.333	0	0	0	0	8.333	5.128	0	3.111		2.25517	0	0	2.857	0	4.333	2.016	2.636	2.333	4.259	3.167	0	1.754	5	1.111	6.325	0.855	0	0.901	7.667	0	0.37	0
2.2635	0.476	0	8.718	0	0	0	0	0	2.222	3.59	0	0		2.2635	0	0	2.857	0	3.167	8.062	1.395	7	1.296	4.333	0.381	2.456	3.5	1.111	3.419	0	0	1.982	7.667	0	0	0
2.27183	0	0	0	0	2.963	7.083	0	0	0	0	0	0		2.27183	0	0	2.667	0	4.167	8.527	3.566	2	5.185	0.333	1.524	2.105	0.5	0.794	2.564	1.026	0	2.703	5	0	0	0
2.28017	4.762	0	0	0	6.667	7.917	0	0	5	0	0	0		2.28017	0	0	2.857	0	11.333	2.636	5.581	2.833	5.556	2.833	0	0.526	1.833	3.175	2.564	1.88	0	3.063	3.333	0.813	0	0.404
2.2885	7.143	0	1.538	0	0	3.333	0	0	7.222	0	0	0		2.2885	0	0	2.857	0	10	5.891	3.721	4.333	0.556	8.333	3.81	0.702	3	2.54	3.59	0	0	4.144	3.333	0.976	0	3.03
2.29683	0	0	5.641	0	0.37	2.083	0	0	0	0	0	0		2.29683	0	0	2.857	0	6	9.147	1.24	2.667	0.37	3.5	4.571	0	1	1.746	7.521	1.538	0	0	2.333	0	0	3.03
2.30517	0	0	15.385	1.333	0	0	0	0	3.333	0	0	0		2.30517	0	0	2.857	0	1.5	4.341	1.86	1.167	1.852	15	0	1.579	0.5	1.587	5.47	0.513	0	0	0.333	0.163	2.222	2.222
2.3135	0.952	0	11.795	6.667	0	0	0	0	5	0	0	0		2.3135	0	0	3.238	0	0.333	3.256	1.085	2	0.37	5.667	0	2.632	1.833	2.381	2.393	0.171	0	0	1	2.439	1.296	0.404
2.32183	0	0.444	6.154	0.444	0	0	2.857	0	3.889	0	0	0		2.32183	0	0.392	2.857	0.351	0.333	2.946	1.86	2.167	1.481	3.667	0	0	0.333	4.762	2.393	0.171	0	8.468	0	4.39	5.556	0
2.33017	2.381	1.333	4.103	4.889	0	0	3.81	0	0	0	0	0		2.33017	0	0	2.857	0.351	1.667	0.775	4.031	2.167	5.185	1	1.524	0	5.667	1.587	1.026	2.564	0	5.225	0.667	2.764	5.37	0
2.3385	0	3.111	6.154	0	3.704	0	1.905	0	0	0	0	0		2.3385	0	0	2.857	6.842	4.667	1.55	2.946	4.5	2.593	6.667	1.714	0	7.5	0.317	0.342	1.368	0	2.703	0.167	2.764	4.63	0
2.34683	0	0	6.667	0	7.407	0	0	0	0	0	0	0		2.34683	1.167	0	2.857	7.895	0.333	3.256	3.411	7.833	5.37	3.833	0.952	0.877	4.833	0.159	3.248	1.709	1.373	2.703	0	0.813	3.333	0
2.35517	5.238	9.333	10.256	0	2.222	0	0	0	0	0	0	0		2.35517	0.333	1.176	2.857	6.491	0.167	5.116	0.93	7	5.185	1	1.143	0	1.167	0	8.718	0.855	0	4.324	1.333	2.276	2.778	0
2.3635	5.714	8.889	4.615	0	2.593	0	0	0	0	0	0	0		2.3635	0	0	2.857	4.211	6.667	6.202	0.93	13.167	3.333	0.833	1.524	3.158	0.167	0.476	3.59	0.171	1.765	2.703	0.833	2.439	3.519	0
2.37183	0	0	3.59	0	5.556	0.417	0	0	4.444	0	0	0		2.37183	0	0	2.857	2.632	2	0.155	2.481	5.333	5.556	1	3.619	0	0.167	4.762	0.684	0	3.333	2.703	0.167	1.138	5.556	0
2.38017	0	0	0	4.889	3.704	0	0	1.25	4.444	0	0	0		2.38017	1	0	2.857	0.351	1.667	0.93	1.705	4.333	4.259	3.833	3.429	0	0	4.762	5.47	1.709	5.098	3.964	0	2.602	5.556	0
2.3885	0	0	1.026	0	1.481	0.417	0	1.667	5.556	0	0	0		2.3885	1.5	0.784	2.857	0.175	0.667	2.171	2.326	6.167	3.519	3	6.095	0	0.5	5.079	7.35	0	6.863	4.865	0	1.301	8.148	0
2.39683	0	6.667	3.077	0	1.111	3.333	0	0	10	0	0	0		2.39683	0	0	2.857	2.982	4.667	4.961	8.062	11.167	3.889	4.5	3.81	0	2.667	6.667	7.35	0	7.451	1.261	0.167	0	4.63	1.212
2.40517	0	0	11.795	0	1.481	3.333	0	0	5	0	0	5.333		2.40517	1.5	0	4.571	2.982	3.333	10.078	2.481	6.667	2.593	4.667	1.143	0.526	1.333	5.556	9.06	0	8.431	0	0	0	2.778	3.232
2.4135	0	0	9.744	0	3.704	0	0	0	0	1.538	0	6.667		2.4135	1.333	0	4.571	1.754	3.667	7.442	1.395	1.667	0	8.5	3.619	0	0.5	3.016	10.94	0.855	5.098	1.081	0	0	2.778	3.03
2.422	0	0	0	0	1.852	0	0	0	0	1.026	0	6.667		2.422	0.333	0.196	2.857	1.053	4.667	3.256	3.566	1	2.037	6.833	4.19	0	0.833	2.698	10.769	0	3.137	0.901	0	0	2.778	0.202
2.43033	0	0	1.026	0	2.593	0	0	0	2.222	0	0	0.444		2.43033	0	1.569	2.857	2.632	5.833	5.891	4.341	0.667	3.889	2	6.095	0	1	0.952	12.479	0.855	5.294	0	0	0	2.593	0
2.43867	0	0	0.513	0	0	0	0	0	0	0	0	0		2.43867	0	0	2.857	0.877	2.167	3.411	8.217	3.167	3.333	2.167	2.667	0	3.333	0	11.282	2.051	1.765	0	0	0	2.593	0
2.447	0	0	12.308	0	0	0	0	0	0	0	0	0		2.447	0	0	2.857	0.175	1.667	1.24	3.721	6.167	0.556	1	3.429	0	4.667	9.206	10.427	0.855	3.529	0	1.667	0	2.778	0
2.45533	0	0.444	6.667	0	0	0	0	0	0	0	0	0		2.45533	0	0.588	2.286	2.281	1	5.426	3.256	7.167	2.222	2.833	1.714	0	1.167	10	10.256	1.368	3.725	0	1	0.976	2.778	0
2.46367	0	0	6.667	4.444	4.815	0	0	0	0	0	0	0		2.46367	0	0.196	2.286	5.614	1.167	0.62	2.326	6.667	3.148	1	1.714	0	0.333	13.81	9.915	2.564	3.137	0	0	1.626	2.778	0
2.472	0	0	0.513	4.889	1.481	0	0	0	0	0	0	0		2.472	0	0	2.857	5.263	4.167	1.86	1.86	0.833	0.556	2.333	3.048	0	0.833	7.937	7.692	1.709	2.941	0.901	2.5	0	2.778	0
2.48033	0	0	2.564	0	0	2.917	0	2.083	0	0	0	0		2.48033	0	0.588	2.857	5.263	2.333	2.016	4.031	0.833	0	3	0.571	0	0.333	5.556	7.692	3.419	2.941	0	2.5	0	2.778	0
2.48867	4.762	0	0	0	0.37	0	1.905	0	0	0	0	0		2.48867	0	0	2.857	5.263	2.167	2.481	3.256	4.167	0	4.167	1.714	2.456	0	1.429	7.692	2.222	2.941	0	3.167	0	2.778	0
2.497	1.905	0	3.59	0	0	0	0	0	0	5.128	0	0		2.497	0	0	2.857	6.14	2	5.116	6.977	4.167	5.185	3.5	2.667	0.877	0.5	0.952	5.983	1.026	1.373	0.721	1.5	0.163	2.778	0
2.50533	0	0	4.103	0	0	5.417	0	0.833	0	1.538	0	0		2.50533	0	0	2.857	9.474	0.5	0.31	3.256	4.5	3.889	1.667	4.571	0	4.167	0.159	3.077	0.171	0	2.703	2	0	0	0
