# Supplementary material for: Cell type-specific contributions to a persistent aggressive internal state in female Drosophila
Source: eLife. 2025 Jul 25;12:RP88598. doi: 10.7554/eLife.88598 (PMC12296262; doi:10.7554/eLife.88598)
Supplement: Figure 2—source data 1. [file elife-88598-fig2-data1.xlsx]

## Sheet: Figure2
Figure 2C - Source Data
11 - 13 minutes					13 - 15 minutes					15 - 17 minutes					17 - 19 minutes					19 - 21 minutes
Cntrl>CsChrimson	pC1d>CsChrimson	aIPg>CsChrimson	pC1d+e>CsChrimson		Cntrl>CsChrimson	pC1d>CsChrimson	aIPg>CsChrimson	pC1d+e>CsChrimson		Cntrl>CsChrimson	pC1d>CsChrimson	aIPg>CsChrimson	pC1d+e>CsChrimson		Cntrl>CsChrimson	pC1d>CsChrimson	aIPg>CsChrimson	pC1d+e>CsChrimson		Cntrl>CsChrimson	pC1d>CsChrimson	aIPg>CsChrimson	pC1d+e>CsChrimson
0.00638889	0.00138889	0.00194444	0.005		0.00444444	0.000833333	0.00138889	0.0180556		0.00694444	0.00388889	0.00222222	0.00611111		0.00583333	0.0105556	0.0025	0.00861111		0.00611111	0.00722222	0.00222222	0.00361111
0.00222222	0.00138889	0.00111111	0.00388889		0.00472222	0.00916667	0.00166667	0		0.00222222	0.0130556	0.00833333	0.00333333		0.00111111	0.0180556	0.00444444	0.00111111		0.00111111	0.00888889	0.000555556	0.0147222
0.00444444	0.0122222	0.0075	0.00472222		0.0025	0.000555556	0.00638889	0.00527778		0.005	0.00694444	0.005	0.0155556		0.00111111	0.00305556	0.0025	0.0197222		0.00277778	0.00611111	0.000555556	0.0177778
0.00194444	0.00833333	0.00416667	0.00777778		0.00666667	0.0025	0.00777778	0.0136111		0.00861111	0.00333333	0.00416667	0.0163889		0.00416667	0.00583333	0.00388889	0.0163889		0	0.00194444	0.00194444	0.00472222
0.00111111	0.000277778	0.00166667	0.00472222		0.000277778	0.000555556	0.00138889	0.00555556		0.000833333	0.00138889	0.00111111	0.00333333		0	0.000833333	0	0.00583333		0.000277778	0.00222222	0.000833333	0.00888889
0.000555556	0	0.0025	0.00194444		0.000555556	0.00111111	0.00472222	0.000555556		0.000833333	0.000277778	0.00194444	0.00166667		0.000833333	0.000277778	0.00194444	0.000833333		0.0025	0	0.00222222	0
0.00166667	0.00166667	0.00583333	0.00111111		0.00444444	0.000833333	0.00194444	0.0025		0.00527778	0.00166667	0.00361111	0		0.00277778	0.00472222	0.00305556	0		0.000833333	0.00138889	0.00305556	0.00305556
0.000555556	0	0.00777778	0.0025		0.000277778	0.000555556	0.0075	0.0183333		0.00194444	0	0.00138889	0.00777778		0.000555556	0.00138889	0.00166667	0.000833333		0.00111111	0	0.00416667	0.00972222
0.000277778	0.00388889	0.00527778	0.0075		0	0.000833333	0.00333333	0.0275		0	0.00111111	0.00138889	0.0330556		0.000277778	0.0025	0.00472222	0.00944444		0.000277778	0.000277778	0.000277778	0.0025
0.00361111	0.000833333	0.00194444	0.005		0.000555556	0.000277778	0.00138889	0.0130556		0.000555556	0.00166667	0.000555556	0.00111111		0.00111111	0.00277778	0.000277778	0.01		0.00361111	0.000277778	0	0.00305556
0.000277778	0.00111111	0.00166667	0.0202778		0	0.000555556	0.00166667	0.0161111		0	0	0.000277778	0.0222222		0	0	0.00166667	0.00722222		0.000833333	0	0.00111111	0.000833333
0.00277778	0.000277778	0.00305556	0.00166667		0.00388889	0.00416667	0.00388889	0.00416667		0	0.00138889	0.00194444	0.00388889		0.00138889	0	0.00166667	0.00333333		0.000833333	0.00138889	0.000555556	0.00194444
0.00166667	0.000277778	0.00194444	0.00666667		0.00361111	0.00166667	0.0122222	0.00472222		0.00472222	0.00166667	0.0113889	0.00444444		0.000833333	0.0025	0.00305556	0.0111111		0.00583333	0.000833333	0.00222222	0.00444444
0.000277778	0.00444444	0.00444444	0.00805556		0.00277778	0.00361111	0.00194444	0.00611111		0.00111111	0.00333333	0.00277778	0.00666667		0.00138889	0.00333333	0.000555556	0.000833333		0.00194444	0	0	0.000833333
0	0.00222222	0.0111111	0.00166667		0.000555556	0	0.00444444	0.00222222		0	0.000555556	0.00166667	0.00166667		0.000277778	0	0.00277778	0.000833333		0	0.000277778	0.00111111	0
0.00777778	0.00416667	0.00194444	0.0127778		0.00111111	0.00166667	0.00472222	0.00527778		0.000833333	0	0.00194444	0.00305556		0.000277778	0	0.00111111	0.00527778		0	0.000277778	0.00305556	0.00777778
0.00111111	0.00388889	0.0111111	0.00166667		0.000555556	0.00555556	0.0108333	0.00222222		0.00305556	0.00611111	0.00888889	0.00166667		0.00277778	0.000555556	0.00166667	0.00222222		0.00555556	0.000833333	0.00277778	0.000277778
0	0.00527778	0.00527778	0.00694444		0.00194444	0	0.00166667	0.0025		0.00305556	0.00305556	0.000555556	0		0.00361111	0.000277778	0.000555556	0		0.000833333	0.000277778	0.00194444	0.000555556
0.00361111	0.0025	0.00333333	0.00555556		0.00722222	0.00638889	0.000555556	0.00472222		0.00444444	0.00472222	0.00277778	0.0147222		0.00416667	0.00444444	0.00444444	0.00138889		0.00555556	0.00138889	0.00111111	0
0.000555556	0.00916667	0.00222222	0.0211111		0.00111111	0.0141667	0.00194444	0.000277778		0.00166667	0.000277778	0.00111111	0.000277778		0.000277778	0.00972222	0.00305556	0.000555556		0.00305556	0.0025	0.00166667	0.000277778
0.00277778		0.00583333	0.00694444		0.00277778		0.005	0.00722222		0.00333333		0.00611111	0.00166667		0.00416667		0.00666667	0.00111111		0.00333333		0.00666667	0.00222222
0.00305556		0.00194444	0.00472222		0.00138889		0.00277778	0.00194444		0.00361111		0.00166667	0.00194444		0.000833333		0.000833333	0.000277778		0.00333333		0	0
0.00388889		0.0211111	0.00611111		0.00527778		0.0105556	0.00194444		0.00277778		0.00777778	0.00555556		0.00444444		0.0136111	0.00777778		0.00444444		0.00555556	0.00444444
		0.0175					0.00805556					0.00416667					0.000833333					0.00194444
		0.0205556					0.015					0.0161111					0.00333333					0.00861111
