# Supplementary material for: Cell type-specific contributions to a persistent aggressive internal state in female Drosophila
Source: eLife. 2025 Jul 25;12:RP88598. doi: 10.7554/eLife.88598 (PMC12296262; doi:10.7554/eLife.88598)
Supplement: Figure 3—figure supplement 1—source data 1. [file elife-88598-fig3-figsupp1-data1.xlsx]

## Sheet: Figure3.1
Figure 3.1C - Source Data
Prior			During			0 - 30 seconds			30 - 60 seconds
Cntrl>Kir2.1	pC1d>Kir2.1		Cntrl>Kir2.1	pC1d>Kir2.1		Cntrl>Kir2.1	pC1d>Kir2.1		Cntrl>Kir2.1	pC1d>Kir2.1
0.00111111	0		0.00666667	0.00111111		0	0.00777778		0	0.0266667
0	0.00111111		0.0177778	0.01		0.00333333	0.0322222		0.00777778	0.00666667
0	0		0.0133333	0.00444444		0.00777778	0.00111111		0.0144444	0.00444444
0	0		0.0211111	0		0.00111111	0.00111111		0.00333333	0
0	0.00111111		0.0244444	0		0.00111111	0.00111111		0.00777778	0
0.00222222	0.00222222		0.00444444	0.00111111		0.0133333	0.0144444		0.00111111	0.01
0.00222222	0.00333333		0	0.00555556		0.00777778	0.00222222		0.00444444	0
0	0.00333333		0	0.0177778		0.00222222	0.00666667		0	0.00111111
0	0		0	0		0	0.00222222		0	0.00777778
0	0		0.00666667	0.00222222		0.00333333	0		0	0.00666667
0	0		0.0155556	0.00111111		0	0.00777778		0.00111111	0
0	0.00111111		0	0.00888889		0.00222222	0.00111111		0.00111111	0.00111111
0	0.00111111		0	0		0	0.00222222		0	0.00444444
0.00111111	0.00333333		0.00777778	0		0	0.00111111		0.00444444	0.00777778
0.00333333	0		0.00222222	0		0.00333333	0.0177778		0.00111111	0.0133333
0.00111111			0			0.00222222			0
