# Supplementary material for: Cell type-specific contributions to a persistent aggressive internal state in female Drosophila
Source: eLife. 2025 Jul 25;12:RP88598. doi: 10.7554/eLife.88598 (PMC12296262; doi:10.7554/eLife.88598)
Supplement: Figure 4—figure supplement 1—source data 1. [file elife-88598-fig4-figsupp1-data1.xlsx]

## Sheet: Figure4.1
Figure 4.1 - Source Data
4.1A				4.1B				4.1C				4.1D
Baseline	Stim	Post-Stim		Baseline	Stim	Post-Stim		Baseline	Stim	Post-Stim		Baseline	Stim	Post-Stim
0.0112441	15.8741	0.848872		0.0640112	14.2641	6.13645		0.0300726	16.9261	3.82471		0.155656	0.977631	1.97915
0.00462617	18.0464	1.01734		0.0760748	15.2536	1.14693		0.32322	11.0698	8.9394		0.91913	4.81044	2.4705
0.00412731	16.1909	0.504366		0.00770121	14.8761	1.56698		0.0121218	12.9808	0.0147109		0.163621	11.5602	6.34063
