# Supplementary material for: Cell type-specific contributions to a persistent aggressive internal state in female Drosophila
Source: eLife. 2025 Jul 25;12:RP88598. doi: 10.7554/eLife.88598 (PMC12296262; doi:10.7554/eLife.88598)
Supplement: Figure 4—source data 1. [file elife-88598-fig4-data1.xlsx]

## Sheet: Figure4
Figure 4 - Source Data
4A				4B				4C				4D
Baseline	Stim	Post-Stim		Baseline	Stim	Post-Stim		Baseline	Stim	Post-Stim		Baseline	Stim	Post-Stim
0.086933	17.6512	3.82374		0.00303091	17.5141	0.605042		0.105531	16.3613	3.76946		0.708176	7.06133	2.85637
0.0115185	12.292	3.066		0.0972172	16.9035	4.42549		0.167432	13.8493	1.73904		1.70178	4.17555	4.1124
0.0369744	13.3967	4.54753		0.0372056	17.7905	3.10173		1.96903	9.90973	2.31437		0.914714	3.71338	3.82821
0.00904846	13.4522	1.89821
