# Supplementary material for: Cell type-specific contributions to a persistent aggressive internal state in female Drosophila
Source: eLife. 2025 Jul 25;12:RP88598. doi: 10.7554/eLife.88598 (PMC12296262; doi:10.7554/eLife.88598)
Supplement: Supplementary file 1. [file elife-88598-supp1.xlsx]

## Sheet: Sheet1
Supplementary File 1. Genotype of flies used in each experiment
Figure	Label	Driver	Effector
1C	aIPg	(aIPgSS1; SS36564) VT064565-p65ADZp(attp40); VT043699-ZpGal4DBD(attp2)	20xUAS-CsChrimson-mVenus(attp2)
	pC1d	(pC1dSS1; SS56987) R35C10-p65ADZp(attp40); R71A09-ZpGal4DBD(attp2)
	pC1d+e	(pC1dSS3; SS43274) VT25602-p65ADZp(attp40); VT002064-ZpGal4DBD(attp2)
	Control	(emptySS) BDP-p65ADZp(attp40); BDP-ZpGal4DBD(attp2)
2A	Control > Kir2.1	(emptySS) BDP-p65ADZp(attp40); BDP-ZpGal4DBD(attp2)	72C11-LexA(attp40), 13xLexAop2-CsChrimson::tdT3.1(su(Hw)attp5); 10xUAS-eGFP::Kir2.1(attp2)
	pC1d > Kir2.1	(pC1dSS1; SS56987) R35C10-p65ADZp(attp40); R71A09-ZpGal4DBD(attp2)
2B& S4	pC1d > pC1d	(pC1dSS1; SS56987) R35C10-p65ADZp(attp40); R71A09-ZpGal4DBD(attp2)	20xUAS-opGCaMP6s(su(Hw)attp5); 20xUAS-Chrimson::tdT3.1(vk5)
	aIPg > aIPg	(aIPgSS1; SS36564) VT064565-p65ADZp(attp40); VT043699-ZpGal4DBD(attp2)	20xUAS-opGCaMP6s(su(Hw)attp5); 20xUAS-Chrimson::tdT3.1(vk5)
	pC1d > aIPg	(pC1dSS1; SS56987) R35C10-p65ADZp(attp40); R71A09-ZpGal4DBD(attp2)	72C11LexA(attp40), 20xUAS-Chrimson::tdT3.1(su(Hw)attp5); 13xLexAop2-jGCaMP7b(vk5)
	aIPg > pC1d	(pC1dSS1; SS56987) R35C10-p65ADZp(attp40); R71A09-ZpGal4DBD(attp2)	72C11LexA(attp40), 20xUAS-opGCaMP6s(su(Hw)attp5); 13xLexAop2-CsChrimson::TdT3.1(vk5)
S2	Target	Group-housed wild-type virgins	N/A
	aIPg	(aIPgSS1; SS36564) VT064565-p65ADZp(attp40); VT043699-ZpGal4DBD(attp2)	20xUAS-CsChrimson-mVenus(attp2)
	pC1d	(pC1dSS1; SS56987) R35C10-p65ADZp(attp40); R71A09-ZpGal4DBD(attp2)
	pC1d+e	(pC1dSS3; SS43274) VT25602-p65ADZp(attp40); VT002064-ZpGal4DBD(attp2)
	Control	(emptySS) BDP-p65ADZp(attp40); BDP-ZpGal4DBD(attp2)
S3	Control >CsChR	(emptySS) BDP-p65ADZp(attp40); BDP-ZpGal4DBD(attp2)	20xUAS-CsChrimson-mVenus(attp2)
	aIPg > CsChR	(aIPgSS1; SS36564) VT064565-p65ADZp(attp40); VT043699-ZpGal4DBD(attp2)
	pC1d+e > CsChR	(pC1dSS3; SS43274) VT25602-p65ADZp(attp40); VT002064-ZpGal4DBD(attp2)
